# Supplementary material for: Ancient Horizontal Gene Transfers from Plastome to Mitogenome of a Nonphotosynthetic Orchid, Gastrodia pubilabiata (Epidendroideae, Orchidaceae)
Source: MDPI journal article supplement (doi:10.3390/ijms241411448), 2023-07-14
Supplement: s1 [file s1]

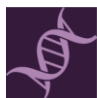

Supplementary Tables S1-S6.

**Table S1.** The repeats analysis results among plastomes and mitogenomes of the genus *Gastrodia*.

| Number | Location | Start | End   | Location | Start | End   |
|--------|----------|-------|-------|----------|-------|-------|
| 1      | OR004100 | 23958 | 24298 | OR004100 | 23958 | 24298 |
| 2      | OR004100 | 23964 | 24271 | OR004100 | 23964 | 24271 |
| 3      | OR004100 | 38870 | 39171 | OR004100 | 38870 | 39171 |
| 4      | OR004100 | 19285 | 19877 | OR004101 | 53761 | 54353 |
| 5      | OR004100 | 20228 | 20527 | OR004128 | 13177 | 13476 |
| 6      | OR004109 | 2800  | 3347  | OR004109 | 2800  | 3347  |
| 7      | OR004109 | 10360 | 10744 | OR004109 | 10360 | 10744 |
| 8      | OR004109 | 22595 | 23747 | OR004101 | 4447  | 5599  |
| 9      | OR004109 | 17414 | 18356 | OR004101 | 448   | 1390  |
| 10     | OR004109 | 19507 | 20140 | OR004101 | 2540  | 3173  |
| 11     | OR004109 | 18355 | 18949 | OR004101 | 1397  | 1991  |
| 12     | OR004109 | 1     | 444   | OR004101 | 5649  | 6092  |
| 13     | OR004109 | 712   | 1150  | OR004101 | 6371  | 6809  |
| 14     | OR004109 | 18952 | 19329 | OR004101 | 1991  | 2368  |
| 15     | OR004109 | 17061 | 17413 | OR004101 | 96    | 448   |
| 16     | OR004109 | 1207  | 1554  | OR004101 | 6861  | 7208  |
| 17     | OR004109 | 3539  | 4414  | OR004138 | 2506  | 3381  |
| 18     | OR004110 | 8174  | 8575  | OR004110 | 8174  | 8575  |
| 19     | OR004110 | 7840  | 8175  | OR004110 | 7840  | 8175  |
| 20     | OR004111 | 15887 | 16370 | OR004100 | 19510 | 19993 |
| 21     | OR004111 | 19280 | 19649 | OR004111 | 19280 | 19649 |
| 22     | OR004111 | 20773 | 21521 | OR004101 | 44814 | 45562 |
| 23     | OR004111 | 17588 | 18235 | OR004101 | 39802 | 40449 |
| 24     | OR004111 | 20773 | 21335 | OR004101 | 44814 | 45376 |
| 25     | OR004111 | 20362 | 20773 | OR004101 | 44404 | 44815 |
| 26     | OR004111 | 21521 | 21899 | OR004101 | 45561 | 45939 |
| 27     | OR004111 | 15567 | 15899 | OR004101 | 53078 | 53410 |
| 28     | OR004111 | 12185 | 12726 | OR004104 | 23304 | 23845 |
| 29     | OR004111 | 16791 | 18351 | OR004107 | 18212 | 19772 |
| 30     | OR004111 | 15432 | 16370 | OR004107 | 16847 | 17785 |
| 31     | OR004111 | 17588 | 18235 | OR004107 | 19009 | 19656 |
| 32     | OR004111 | 21524 | 22122 | OR004107 | 22963 | 23561 |
| 33     | OR004111 | 20773 | 21335 | OR004107 | 22191 | 22753 |
| 34     | OR004111 | 20222 | 20773 | OR004107 | 21641 | 22192 |

|    |          |       |       |          |       |       |
|----|----------|-------|-------|----------|-------|-------|
| 35 | OR004111 | 15887 | 16370 | OR004107 | 17302 | 17785 |
| 36 | OR004111 | 19760 | 20225 | OR004107 | 21180 | 21645 |
| 37 | OR004111 | 18791 | 19218 | OR004107 | 20210 | 20637 |
| 38 | OR004111 | 20362 | 20773 | OR004107 | 21781 | 22192 |
| 39 | OR004111 | 21521 | 21899 | OR004107 | 22960 | 23338 |
| 40 | OR004111 | 15567 | 15899 | OR004107 | 16982 | 17314 |
| 41 | OR004112 | 11209 | 11657 | OR004109 | 10274 | 10722 |
| 42 | OR004112 | 11187 | 11571 | OR004112 | 11187 | 11571 |
| 43 | OR004113 | 1907  | 3357  | OR004113 | 19470 | 20920 |
| 44 | OR004113 | 658   | 1321  | OR004113 | 18251 | 18914 |
| 45 | OR004113 | 1     | 656   | OR004113 | 17590 | 18245 |
| 46 | OR004113 | 7895  | 8611  | OR004102 | 17301 | 18017 |
| 47 | OR004114 | 13009 | 13457 | OR004109 | 10274 | 10722 |
| 48 | OR004114 | 13009 | 13457 | OR004112 | 11209 | 11657 |
| 49 | OR004114 | 13095 | 13479 | OR004114 | 13095 | 13479 |
| 50 | OR004115 | 3565  | 4058  | OR004105 | 13813 | 14306 |
| 51 | OR004115 | 3543  | 4029  | OR004105 | 13791 | 14277 |
| 52 | OR004115 | 2580  | 3388  | OR004106 | 12862 | 13670 |
| 53 | OR004115 | 3565  | 4058  | OR004107 | 16310 | 16803 |
| 54 | OR004115 | 3543  | 4029  | OR004107 | 16339 | 16825 |
| 55 | OR004115 | 3565  | 4058  | OR004108 | 5256  | 5749  |
| 56 | OR004115 | 3543  | 4029  | OR004108 | 5234  | 5720  |
| 57 | OR004101 | 18367 | 22262 | OR004100 | 5856  | 9751  |
| 58 | OR004101 | 15215 | 17052 | OR004100 | 3287  | 5124  |
| 59 | OR004101 | 51771 | 52693 | OR004100 | 20963 | 21885 |
| 60 | OR004101 | 14469 | 15216 | OR004100 | 2542  | 3289  |
| 61 | OR004101 | 23115 | 23798 | OR004100 | 10550 | 11233 |
| 62 | OR004101 | 22311 | 22870 | OR004100 | 9749  | 10308 |
| 63 | OR004101 | 53761 | 54277 | OR004100 | 19361 | 19877 |
| 64 | OR004101 | 52038 | 52453 | OR004100 | 21203 | 21618 |
| 65 | OR004101 | 13308 | 13702 | OR004100 | 1383  | 1777  |
| 66 | OR004101 | 53109 | 53487 | OR004100 | 20151 | 20529 |
| 67 | OR004101 | 14041 | 14386 | OR004100 | 2116  | 2461  |
| 68 | OR004101 | 28072 | 28411 | OR004100 | 18929 | 19268 |
| 69 | OR004101 | 54432 | 54752 | OR004100 | 18886 | 19206 |
| 70 | OR004101 | 14483 | 14800 | OR004100 | 2556  | 2873  |
| 71 | OR004101 | 6861  | 7606  | OR004109 | 1207  | 1952  |
| 72 | OR004101 | 24062 | 24942 | OR004101 | 41898 | 42778 |

|     |          |       |       |          |       |       |
|-----|----------|-------|-------|----------|-------|-------|
| 73  | OR004101 | 27131 | 27836 | OR004101 | 38957 | 39662 |
| 74  | OR004101 | 42060 | 42739 | OR004101 | 24101 | 24780 |
| 75  | OR004101 | 25199 | 25872 | OR004101 | 40960 | 41633 |
| 76  | OR004101 | 32413 | 33011 | OR004101 | 36148 | 36746 |
| 77  | OR004101 | 29846 | 30427 | OR004101 | 34469 | 35050 |
| 78  | OR004101 | 26419 | 26985 | OR004101 | 26419 | 26985 |
| 79  | OR004101 | 32413 | 32957 | OR004101 | 36202 | 36746 |
| 80  | OR004101 | 25898 | 26419 | OR004101 | 40376 | 40897 |
| 81  | OR004101 | 34665 | 35162 | OR004101 | 36091 | 36588 |
| 82  | OR004101 | 34723 | 35162 | OR004101 | 32571 | 33010 |
| 83  | OR004101 | 34723 | 35162 | OR004101 | 36149 | 36588 |
| 84  | OR004101 | 32571 | 33010 | OR004101 | 36149 | 36588 |
| 85  | OR004101 | 33367 | 33774 | OR004101 | 33367 | 33774 |
| 86  | OR004101 | 36086 | 36476 | OR004101 | 29846 | 30236 |
| 87  | OR004101 | 36086 | 36476 | OR004101 | 34660 | 35050 |
| 88  | OR004101 | 29846 | 30236 | OR004101 | 34660 | 35050 |
| 89  | OR004101 | 33348 | 33734 | OR004101 | 33348 | 33734 |
| 90  | OR004101 | 30055 | 30420 | OR004101 | 30055 | 30420 |
| 91  | OR004101 | 34476 | 34841 | OR004101 | 34476 | 34841 |
| 92  | OR004101 | 37337 | 37702 | OR004101 | 37337 | 37702 |
| 93  | OR004101 | 38957 | 39296 | OR004101 | 27497 | 27836 |
| 94  | OR004101 | 31640 | 31978 | OR004101 | 34331 | 34669 |
| 95  | OR004101 | 31271 | 31604 | OR004101 | 31271 | 31604 |
| 96  | OR004101 | 32695 | 33028 | OR004101 | 32695 | 33028 |
| 97  | OR004101 | 37979 | 38309 | OR004101 | 37979 | 38309 |
| 98  | OR004101 | 32285 | 32615 | OR004101 | 32285 | 32615 |
| 99  | OR004101 | 33855 | 34179 | OR004101 | 35284 | 35608 |
| 100 | OR004101 | 37177 | 37498 | OR004101 | 29292 | 29613 |
| 101 | OR004101 | 28415 | 28735 | OR004101 | 38056 | 38376 |
| 102 | OR004101 | 38381 | 38691 | OR004101 | 38381 | 38691 |
| 103 | OR004101 | 34331 | 34636 | OR004101 | 31673 | 31978 |
| 104 | OR004101 | 34331 | 34636 | OR004101 | 35759 | 36064 |
| 105 | OR004101 | 31673 | 31978 | OR004101 | 35759 | 36064 |
| 106 | OR004101 | 28735 | 29039 | OR004101 | 37753 | 38057 |
| 107 | OR004101 | 37972 | 38274 | OR004101 | 32320 | 32622 |
| 108 | OR004119 | 9850  | 10442 | OR004115 | 16346 | 16938 |
| 109 | OR004119 | 10738 | 11138 | OR004115 | 17230 | 17630 |
| 110 | OR004119 | 9041  | 9352  | OR004115 | 15546 | 15857 |

|     |          |       |       |          |       |       |
|-----|----------|-------|-------|----------|-------|-------|
| 111 | OR004119 | 8544  | 8855  | OR004115 | 15045 | 15356 |
| 112 | OR004119 | 4827  | 5155  | OR004106 | 10874 | 11202 |
| 113 | OR004119 | 2116  | 2427  | OR004106 | 8874  | 9185  |
| 114 | OR004120 | 11650 | 12366 | OR004113 | 7895  | 8611  |
| 115 | OR004120 | 11686 | 12447 | OR004102 | 17337 | 18098 |
| 116 | OR004120 | 11650 | 12366 | OR004102 | 17301 | 18017 |
| 117 | OR004121 | 3120  | 3780  | OR004116 | 85    | 745   |
| 118 | OR004121 | 3091  | 3736  | OR004116 | 129   | 774   |
| 119 | OR004122 | 12805 | 13282 | OR004114 | 12974 | 13451 |
| 120 | OR004122 | 12710 | 13247 | OR004103 | 16957 | 17494 |
| 121 | OR004123 | 9870  | 10593 | OR004102 | 31803 | 32526 |
| 122 | OR004123 | 9832  | 10469 | OR004102 | 31765 | 32402 |
| 123 | OR004123 | 10003 | 10607 | OR004102 | 31936 | 32540 |
| 124 | OR004123 | 13627 | 13964 | OR004106 | 23805 | 24142 |
| 125 | OR004124 | 1761  | 2209  | OR004109 | 10274 | 10722 |
| 126 | OR004124 | 1761  | 2209  | OR004112 | 11209 | 11657 |
| 127 | OR004124 | 1761  | 2209  | OR004114 | 13009 | 13457 |
| 128 | OR004124 | 1787  | 2262  | OR004124 | 1787  | 2262  |
| 129 | OR004125 | 1468  | 2081  | OR004125 | 1468  | 2081  |
| 130 | OR004125 | 1432  | 2043  | OR004125 | 1432  | 2043  |
| 131 | OR004126 | 5040  | 5644  | OR004123 | 10003 | 10607 |
| 132 | OR004126 | 5040  | 5644  | OR004102 | 31936 | 32540 |
| 133 | OR004126 | 14405 | 14719 | MF070101 | 19207 | 19521 |
| 134 | OR004127 | 4113  | 4505  | OR004100 | 1201  | 1593  |
| 135 | OR004127 | 5471  | 5788  | OR004100 | 2556  | 2873  |
| 136 | OR004127 | 4113  | 4430  | OR004100 | 1201  | 1518  |
| 137 | OR004127 | 13053 | 13797 | OR004109 | 11666 | 12410 |
| 138 | OR004127 | 14419 | 15140 | OR004109 | 13044 | 13765 |
| 139 | OR004127 | 11989 | 12486 | OR004109 | 10615 | 11112 |
| 140 | OR004127 | 11991 | 12333 | OR004109 | 10617 | 10959 |
| 141 | OR004127 | 3269  | 3767  | OR004101 | 12281 | 12779 |
| 142 | OR004127 | 4500  | 4977  | OR004101 | 13512 | 13989 |
| 143 | OR004127 | 4567  | 4977  | OR004101 | 13579 | 13989 |
| 144 | OR004127 | 5471  | 5788  | OR004101 | 14483 | 14800 |
| 145 | OR004127 | 11194 | 11718 | OR004135 | 2010  | 2534  |
| 146 | OR004127 | 1987  | 2485  | OR004106 | 14688 | 15186 |
| 147 | OR004127 | 1601  | 1984  | OR004106 | 14303 | 14686 |
| 148 | OR004128 | 527   | 916   | OR004100 | 18879 | 19268 |

|     |          |       |       |          |       |       |
|-----|----------|-------|-------|----------|-------|-------|
| 149 | OR004128 | 577   | 916   | OR004100 | 18929 | 19268 |
| 150 | OR004128 | 534   | 854   | OR004100 | 18886 | 19206 |
| 151 | OR004128 | 1561  | 2335  | OR004101 | 36979 | 37753 |
| 152 | OR004128 | 3918  | 4547  | OR004101 | 32342 | 32971 |
| 153 | OR004128 | 3989  | 4533  | OR004101 | 32413 | 32957 |
| 154 | OR004128 | 3989  | 4533  | OR004101 | 36202 | 36746 |
| 155 | OR004128 | 606   | 1024  | OR004101 | 38273 | 38691 |
| 156 | OR004128 | 1     | 396   | OR004101 | 38904 | 39299 |
| 157 | OR004128 | 484   | 854   | OR004101 | 54432 | 54802 |
| 158 | OR004128 | 11653 | 12020 | OR004101 | 32155 | 32522 |
| 159 | OR004128 | 577   | 943   | OR004101 | 28072 | 28438 |
| 160 | OR004128 | 577   | 916   | OR004101 | 28072 | 28411 |
| 161 | OR004128 | 1816  | 2137  | OR004101 | 37177 | 37498 |
| 162 | OR004128 | 1816  | 2137  | OR004101 | 29292 | 29613 |
| 163 | OR004128 | 534   | 854   | OR004101 | 54432 | 54752 |
| 164 | OR004128 | 3107  | 3418  | OR004101 | 35895 | 36206 |
| 165 | OR004128 | 1024  | 1326  | OR004101 | 37972 | 38274 |
| 166 | OR004128 | 1024  | 1326  | OR004101 | 32320 | 32622 |
| 167 | OR004128 | 1612  | 1977  | OR004128 | 1612  | 1977  |
| 168 | OR004128 | 4     | 343   | OR004128 | 4     | 343   |
| 169 | OR004128 | 2770  | 3105  | OR004128 | 2770  | 3105  |
| 170 | OR004128 | 2437  | 2767  | OR004128 | 2437  | 2767  |
| 171 | OR004128 | 4237  | 4556  | OR004128 | 4237  | 4556  |
| 172 | OR004128 | 5679  | 5995  | OR004128 | 5679  | 5995  |
| 173 | OR004128 | 2079  | 2388  | OR004128 | 3499  | 3808  |
| 174 | OR004129 | 4559  | 5234  | OR004113 | 8007  | 8682  |
| 175 | OR004129 | 4630  | 5234  | OR004129 | 4630  | 5234  |
| 176 | OR004130 | 2614  | 3093  | OR004112 | 11209 | 11688 |
| 177 | OR004130 | 2645  | 3182  | OR004122 | 12710 | 13247 |
| 178 | OR004130 | 2645  | 3182  | OR004103 | 16957 | 17494 |
| 179 | OR004132 | 5686  | 6346  | OR004116 | 85    | 745   |
| 180 | OR004132 | 5730  | 6375  | OR004116 | 129   | 774   |
| 181 | OR004132 | 5686  | 6346  | OR004121 | 3120  | 3780  |
| 182 | OR004132 | 5730  | 6375  | OR004121 | 3091  | 3736  |
| 183 | OR004132 | 5843  | 6422  | OR004121 | 3044  | 3623  |
| 184 | OR004132 | 5552  | 6071  | OR004104 | 22987 | 23506 |
| 185 | OR004133 | 1069  | 1574  | OR004110 | 7937  | 8442  |
| 186 | OR004133 | 1333  | 1638  | OR004126 | 5403  | 5708  |

|     |          |       |       |          |        |        |
|-----|----------|-------|-------|----------|--------|--------|
| 187 | OR004133 | 881   | 1211  | OR004104 | 22939  | 23269  |
| 188 | OR004135 | 8661  | 8978  | OR004100 | 1201   | 1518   |
| 189 | OR004135 | 7418  | 8611  | OR004101 | 11100  | 12293  |
| 190 | OR004135 | 9110  | 9871  | OR004101 | 13579  | 14340  |
| 191 | OR004135 | 7418  | 8028  | OR004101 | 11100  | 11710  |
| 192 | OR004135 | 4758  | 5176  | OR004101 | 8834   | 9252   |
| 193 | OR004135 | 9110  | 9520  | OR004101 | 13579  | 13989  |
| 194 | OR004135 | 8034  | 8415  | OR004101 | 11716  | 12097  |
| 195 | OR004135 | 9887  | 10610 | OR004123 | 9870   | 10593  |
| 196 | OR004135 | 10011 | 10648 | OR004123 | 9832   | 10469  |
| 197 | OR004135 | 9873  | 10477 | OR004123 | 10003  | 10607  |
| 198 | OR004135 | 9873  | 10477 | OR004126 | 5040   | 5644   |
| 199 | OR004135 | 1460  | 2014  | OR004127 | 10643  | 11197  |
| 200 | OR004135 | 7320  | 7818  | OR004127 | 1987   | 2485   |
| 201 | OR004135 | 9110  | 9520  | OR004127 | 4567   | 4977   |
| 202 | OR004135 | 6935  | 7318  | OR004127 | 1601   | 1984   |
| 203 | OR004135 | 8602  | 8978  | OR004127 | 4054   | 4430   |
| 204 | OR004135 | 8661  | 8978  | OR004127 | 4113   | 4430   |
| 205 | OR004135 | 1155  | 1463  | OR004127 | 10339  | 10647  |
| 206 | OR004135 | 857   | 1157  | OR004127 | 10040  | 10340  |
| 207 | OR004135 | 9873  | 10655 | OR004102 | 31758  | 32540  |
| 208 | OR004135 | 9887  | 10610 | OR004102 | 31803  | 32526  |
| 209 | OR004135 | 10011 | 10648 | OR004102 | 31765  | 32402  |
| 210 | OR004135 | 9873  | 10477 | OR004102 | 31936  | 32540  |
| 211 | OR004135 | 6770  | 8028  | OR004106 | 14138  | 15396  |
| 212 | OR004135 | 7418  | 8028  | OR004106 | 14786  | 15396  |
| 213 | OR004135 | 7320  | 7818  | OR004106 | 14688  | 15186  |
| 214 | OR004135 | 6935  | 7318  | OR004106 | 14303  | 14686  |
| 215 | OR004135 | 8034  | 8415  | OR004106 | 15400  | 15781  |
| 216 | OR004136 | 6842  | 7421  | OR004121 | 3044   | 3623   |
| 217 | OR004136 | 6842  | 7421  | OR004132 | 5843   | 6422   |
| 218 | OR004137 | 5389  | 6282  | MF070100 | 113333 | 114226 |
| 219 | OR004138 | 2317  | 3381  | OR004109 | 3350   | 4414   |
| 220 | OR004138 | 1     | 1009  | OR004109 | 11597  | 12605  |
| 221 | OR004138 | 70    | 814   | OR004109 | 11666  | 12410  |
| 222 | OR004138 | 1     | 675   | OR004109 | 11597  | 12271  |
| 223 | OR004138 | 4614  | 5102  | OR004101 | 8611   | 9099   |
| 224 | OR004138 | 70    | 814   | OR004127 | 13053  | 13797  |

|     |          |       |       |          |       |       |
|-----|----------|-------|-------|----------|-------|-------|
| 225 | OR004138 | 815   | 1345  | OR004127 | 13799 | 14329 |
| 226 | OR004138 | 3704  | 4294  | OR004135 | 3618  | 4208  |
| 227 | OR004138 | 1766  | 2313  | OR004138 | 1766  | 2313  |
| 228 | OR004103 | 36594 | 36934 | OR004103 | 36594 | 36934 |
| 229 | OR004139 | 1125  | 2000  | OR004109 | 3539  | 4414  |
| 230 | OR004139 | 3292  | 3840  | OR004109 | 1667  | 2215  |
| 231 | OR004139 | 2526  | 2948  | OR004109 | 2568  | 2990  |
| 232 | OR004139 | 3925  | 4272  | OR004109 | 1207  | 1554  |
| 233 | OR004139 | 2169  | 2489  | OR004109 | 3027  | 3347  |
| 234 | OR004139 | 3925  | 4510  | OR004101 | 6623  | 7208  |
| 235 | OR004139 | 3925  | 4272  | OR004101 | 6861  | 7208  |
| 236 | OR004139 | 212   | 802   | OR004135 | 3618  | 4208  |
| 237 | OR004139 | 208   | 2000  | OR004138 | 2506  | 4298  |
| 238 | OR004139 | 1125  | 2000  | OR004138 | 2506  | 3381  |
| 239 | OR004139 | 1998  | 2716  | OR004138 | 1766  | 2484  |
| 240 | OR004139 | 212   | 802   | OR004138 | 3704  | 4294  |
| 241 | OR004139 | 2169  | 2716  | OR004139 | 2169  | 2716  |
| 242 | OR004140 | 33    | 857   | OR004102 | 14806 | 15630 |
| 243 | OR004141 | 1130  | 2024  | OR004109 | 11377 | 12271 |
| 244 | OR004141 | 336   | 1101  | OR004109 | 10611 | 11376 |
| 245 | OR004141 | 1350  | 2024  | OR004109 | 11597 | 12271 |
| 246 | OR004141 | 2781  | 3142  | OR004109 | 13043 | 13404 |
| 247 | OR004141 | 342   | 684   | OR004109 | 10617 | 10959 |
| 248 | OR004141 | 342   | 684   | OR004127 | 11991 | 12333 |
| 249 | OR004141 | 4     | 311   | OR004127 | 11649 | 11956 |
| 250 | OR004141 | 1350  | 2024  | OR004138 | 1     | 675   |
| 251 | OR004141 | 2025  | 2696  | OR004138 | 674   | 1345  |
| 252 | OR004142 | 187   | 647   | OR004100 | 11413 | 11873 |
| 253 | OR004104 | 10311 | 10688 | OR004104 | 23129 | 23506 |
| 254 | OR004106 | 14786 | 15396 | OR004101 | 11100 | 11710 |
| 255 | OR004106 | 15400 | 15781 | OR004101 | 11716 | 12097 |
| 256 | OR004106 | 20201 | 20500 | OR004102 | 16418 | 16717 |
| 257 | OR004106 | 4670  | 5102  | OR004106 | 6200  | 6632  |
| 258 | OR004107 | 17302 | 17934 | OR004100 | 19361 | 19993 |
| 259 | OR004107 | 17418 | 17934 | OR004100 | 19361 | 19877 |
| 260 | OR004107 | 17302 | 17785 | OR004100 | 19510 | 19993 |
| 261 | OR004107 | 21781 | 22753 | OR004101 | 44404 | 45376 |
| 262 | OR004107 | 18954 | 19656 | OR004101 | 39747 | 40449 |

|     |          |       |       |          |       |       |
|-----|----------|-------|-------|----------|-------|-------|
| 263 | OR004107 | 20416 | 21095 | OR004101 | 42060 | 42739 |
| 264 | OR004107 | 20416 | 21095 | OR004101 | 24101 | 24780 |
| 265 | OR004107 | 19009 | 19656 | OR004101 | 39802 | 40449 |
| 266 | OR004107 | 22764 | 23338 | OR004101 | 45365 | 45939 |
| 267 | OR004107 | 22191 | 22753 | OR004101 | 44814 | 45376 |
| 268 | OR004107 | 17418 | 17934 | OR004101 | 53761 | 54277 |
| 269 | OR004107 | 24375 | 24814 | OR004101 | 47427 | 47866 |
| 270 | OR004107 | 23337 | 23774 | OR004101 | 45939 | 46376 |
| 271 | OR004107 | 21781 | 22192 | OR004101 | 44404 | 44815 |
| 272 | OR004107 | 22960 | 23338 | OR004101 | 45561 | 45939 |
| 273 | OR004107 | 24818 | 25151 | OR004101 | 47868 | 48201 |
| 274 | OR004107 | 16982 | 17314 | OR004101 | 53078 | 53410 |
| 275 | OR004107 | 16310 | 16803 | OR004105 | 13813 | 14306 |
| 276 | OR004107 | 16339 | 16825 | OR004105 | 13791 | 14277 |
| 277 | OR004108 | 5256  | 5749  | OR004105 | 13813 | 14306 |
| 278 | OR004108 | 5234  | 5720  | OR004105 | 13791 | 14277 |
| 279 | OR004108 | 5203  | 5618  | OR004105 | 13760 | 14175 |
| 280 | OR004108 | 5256  | 5749  | OR004107 | 16310 | 16803 |
| 281 | OR004108 | 5234  | 5720  | OR004107 | 16339 | 16825 |
| 282 | MF070086 | 27788 | 28095 | OR004120 | 7620  | 7927  |
| 283 | MF070086 | 44749 | 45569 | OR004105 | 24248 | 25068 |
| 284 | MF070086 | 41273 | 41953 | OR004105 | 20457 | 21137 |
| 285 | MF070086 | 46492 | 47088 | OR004105 | 25983 | 26579 |
| 286 | MF070086 | 55725 | 56067 | OR004105 | 5525  | 5867  |
| 287 | MF070086 | 58424 | 58740 | OR004105 | 3194  | 3510  |
| 288 | MF070087 | 26058 | 26696 | OR004109 | 12601 | 13239 |
| 289 | MF070087 | 25359 | 25723 | OR004109 | 13672 | 14036 |
| 290 | MF070087 | 41538 | 42686 | OR004102 | 32747 | 33895 |
| 291 | MF070087 | 39544 | 40217 | OR004102 | 35091 | 35764 |
| 292 | MF070087 | 26521 | 26908 | OR004138 | 794   | 1181  |
| 293 | MF070087 | 58984 | 59439 | MF070085 | 13914 | 14369 |
| 294 | MF070088 | 60281 | 60747 | OR004114 | 15422 | 15888 |
| 295 | MF070088 | 14064 | 14372 | OR004129 | 6910  | 7218  |
| 296 | MF070088 | 24434 | 25022 | OR004130 | 5970  | 6558  |
| 297 | MF070088 | 22547 | 22928 | OR004130 | 8186  | 8567  |
| 298 | MF070088 | 23684 | 24014 | OR004130 | 7079  | 7409  |
| 299 | MF070088 | 44995 | 45783 | OR004103 | 783   | 1571  |
| 300 | MF070088 | 44680 | 44985 | OR004103 | 477   | 782   |



|     |          |        |        |          |       |       |
|-----|----------|--------|--------|----------|-------|-------|
| 301 | MF070088 | 58971  | 59361  | MF070088 | 82395 | 82785 |
| 302 | MF070089 | 94459  | 95085  | OR004143 | 547   | 1173  |
| 303 | MF070089 | 110746 | 288    | MF070086 | 62295 | 62595 |
| 304 | MF070089 | 77505  | 78141  | MF070087 | 60556 | 61192 |
| 305 | MF070089 | 31131  | 31676  | MF070087 | 66418 | 66963 |
| 306 | MF070089 | 6333   | 6726   | MF070087 | 66418 | 66811 |
| 307 | MF070089 | 31283  | 31676  | MF070087 | 66418 | 66811 |
| 308 | MF070089 | 109517 | 109979 | MF070088 | 53728 | 54190 |
| 309 | MF070089 | 109673 | 109979 | MF070088 | 53884 | 54190 |
| 310 | MF070089 | 6333   | 6787   | MF070089 | 31283 | 31737 |
| 311 | MF070089 | 6333   | 6726   | MF070089 | 31283 | 31676 |
| 312 | MF070090 | 310229 | 311055 | OR004109 | 5146  | 5972  |
| 313 | MF070090 | 309379 | 309805 | OR004109 | 4027  | 4453  |
| 314 | MF070090 | 312914 | 313219 | OR004109 | 8176  | 8481  |
| 315 | MF070090 | 405199 | 405802 | OR004114 | 17438 | 18041 |
| 316 | MF070090 | 73477  | 74809  | OR004115 | 8588  | 9920  |
| 317 | MF070090 | 82515  | 83590  | OR004115 | 16364 | 17439 |
| 318 | MF070090 | 75920  | 76715  | OR004115 | 10666 | 11461 |
| 319 | MF070090 | 82497  | 83089  | OR004115 | 16346 | 16938 |
| 320 | MF070090 | 69784  | 70332  | OR004115 | 5342  | 5890  |
| 321 | MF070090 | 81626  | 82167  | OR004115 | 15401 | 15942 |
| 322 | MF070090 | 84477  | 84877  | OR004115 | 18257 | 18657 |
| 323 | MF070090 | 79328  | 79718  | OR004115 | 13383 | 13773 |
| 324 | MF070090 | 70618  | 70979  | OR004115 | 6164  | 6525  |
| 325 | MF070090 | 84113  | 84471  | OR004115 | 17898 | 18256 |
| 326 | MF070090 | 81771  | 82082  | OR004115 | 15546 | 15857 |
| 327 | MF070090 | 71571  | 71874  | OR004115 | 7246  | 7549  |
| 328 | MF070090 | 81111  | 81411  | OR004115 | 14896 | 15196 |
| 329 | MF070090 | 382345 | 383943 | OR004116 | 13605 | 15203 |
| 330 | MF070090 | 384648 | 385108 | OR004116 | 15997 | 16457 |
| 331 | MF070090 | 384178 | 384621 | OR004116 | 15542 | 15985 |
| 332 | MF070090 | 385225 | 385601 | OR004116 | 16535 | 16911 |
| 333 | MF070090 | 82497  | 83089  | OR004119 | 9850  | 10442 |
| 334 | MF070090 | 81771  | 82082  | OR004119 | 9041  | 9352  |
| 335 | MF070090 | 127872 | 128265 | OR004120 | 6717  | 7110  |
| 336 | MF070090 | 127416 | 127831 | OR004121 | 6852  | 7267  |
| 337 | MF070090 | 93417  | 93985  | OR004122 | 1765  | 2333  |
| 338 | MF070090 | 97810  | 98192  | OR004102 | 7408  | 7790  |

|     |          |        |        |          |        |        |
|-----|----------|--------|--------|----------|--------|--------|
| 339 | MF070090 | 97464  | 97803  | OR004102 | 7068   | 7407   |
| 340 | MF070090 | 278862 | 279316 | OR004134 | 10859  | 11313  |
| 341 | MF070090 | 278371 | 278749 | OR004134 | 10402  | 10780  |
| 342 | MF070090 | 59915  | 60321  | OR004107 | 7277   | 7683   |
| 343 | MF070090 | 108847 | 109375 | OR004108 | 575    | 1103   |
| 344 | MF070090 | 107484 | 107789 | OR004108 | 14598  | 14903  |
| 345 | MF070090 | 308154 | 308618 | MF070086 | 7300   | 7764   |
| 346 | MF070090 | 231060 | 231391 | MF070086 | 49050  | 49381  |
| 347 | MF070090 | 126415 | 126745 | MF070086 | 84716  | 85046  |
| 348 | MF070090 | 111373 | 111673 | MF070086 | 62295  | 62595  |
| 349 | MF070090 | 176165 | 177937 | MF070087 | 1      | 1773   |
| 350 | MF070090 | 24483  | 24796  | MF070087 | 1767   | 2080   |
| 351 | MF070090 | 119254 | 119566 | MF070088 | 52237  | 52549  |
| 352 | MF070090 | 198575 | 198881 | MF070088 | 53884  | 54190  |
| 353 | MF070090 | 198575 | 199660 | MF070089 | 109673 | 110758 |
| 354 | MF070090 | 111393 | 111796 | MF070089 | 8      | 411    |
| 355 | MF070090 | 198575 | 198881 | MF070089 | 109673 | 109979 |
| 356 | MF070090 | 111373 | 111673 | MF070089 | 110746 | 288    |
| 357 | MF070090 | 309379 | 309766 | MF070090 | 309379 | 309766 |
| 358 | MF070090 | 22391  | 22735  | MF070090 | 409991 | 410335 |
| 359 | MF070090 | 60110  | 60453  | MF070090 | 363685 | 364028 |
| 360 | MF070090 | 309036 | 309372 | MF070090 | 309036 | 309372 |
| 361 | MF070091 | 2677   | 3000   | OR004123 | 489    | 812    |
| 362 | MF070091 | 2200   | 2505   | OR004123 | 1255   | 1560   |
| 363 | MF070091 | 6141   | 6523   | MF070091 | 55383  | 55765  |
| 364 | MF070093 | 39893  | 41213  | OR004102 | 42040  | 43360  |
| 365 | MF070093 | 38791  | 39880  | OR004102 | 40944  | 42033  |
| 366 | MF070095 | 5853   | 6331   | OR004110 | 2417   | 2895   |
| 367 | MF070098 | 20395  | 21710  | OR004116 | 3989   | 5304   |
| 368 | MF070098 | 22384  | 22755  | OR004116 | 2965   | 3336   |
| 369 | MF070098 | 20082  | 20394  | OR004116 | 5300   | 5612   |
| 370 | MF070100 | 7915   | 8297   | OR004114 | 17799  | 18181  |
| 371 | MF070100 | 8311   | 8653   | OR004114 | 18257  | 18599  |
| 372 | MF070100 | 75067  | 75703  | OR004103 | 30633  | 31269  |
| 373 | MF070100 | 39943  | 41084  | OR004108 | 15832  | 16973  |
| 374 | MF070100 | 34312  | 35107  | OR004108 | 21732  | 22527  |
| 375 | MF070100 | 38242  | 38926  | OR004108 | 17917  | 18601  |
| 376 | MF070100 | 36878  | 37270  | OR004108 | 19578  | 19970  |

|     |          |        |        |          |        |        |
|-----|----------|--------|--------|----------|--------|--------|
| 377 | MF070100 | 37613  | 37948  | OR004108 | 18901  | 19236  |
| 378 | MF070100 | 36568  | 36880  | OR004108 | 19969  | 20281  |
| 379 | MF070100 | 50726  | 51065  | MF070087 | 20970  | 21309  |
| 380 | MF070100 | 83283  | 83585  | MF070087 | 20935  | 21237  |
| 381 | MF070100 | 43873  | 44422  | MF070088 | 41410  | 41959  |
| 382 | MF070100 | 47921  | 48713  | MF070090 | 103635 | 104427 |
| 383 | MF070100 | 21395  | 21871  | MF070090 | 19387  | 19863  |
| 384 | MF070100 | 112267 | 112674 | MF070093 | 1050   | 1457   |
| 385 | MF070101 | 16882  | 18027  | OR004126 | 108    | 1253   |
| 386 | MF070102 | 29461  | 29876  | OR004100 | 21203  | 21618  |
| 387 | MF070102 | 31001  | 31589  | OR004101 | 50184  | 50772  |
| 388 | MF070102 | 29461  | 29876  | OR004101 | 52038  | 52453  |
| 389 | MF070102 | 8737   | 9150   | OR004124 | 6152   | 6565   |
| 390 | MF070102 | 7808   | 8181   | OR004124 | 7343   | 7716   |
| 391 | MF070102 | 7373   | 7708   | OR004124 | 7789   | 8124   |
| 392 | MF070102 | 16480  | 17075  | OR004103 | 42360  | 42955  |
| 393 | NC037409 | 21105  | 24518  | MF070101 | 11073  | 14486  |
| 394 | NC037409 | 20905  | 21336  | MW879162 | 19687  | 20118  |
| 395 | NC037409 | 24677  | 25059  | MW879162 | 23354  | 23736  |
| 396 | NC037409 | 25064  | 25365  | MW879162 | 23742  | 24043  |
| 397 | MW879162 | 14725  | 15722  | OR031839 | 11734  | 12731  |
| 398 | MW879162 | 5686   | 6583   | OR031839 | 2934   | 3831   |
| 399 | MW879162 | 13229  | 13709  | OR031839 | 10192  | 10672  |
| 400 | MW879162 | 19650  | 20131  | OR031839 | 16750  | 17231  |
| 401 | MW879162 | 377    | 864    | OR031839 | 27682  | 28169  |
| 402 | MW879162 | 16255  | 16744  | OR031839 | 13279  | 13768  |
| 403 | MW879162 | 25090  | 25595  | OR031839 | 22416  | 22921  |
| 404 | MW879162 | 1391   | 1890   | OR031839 | 28748  | 29247  |
| 405 | MW879162 | 23226  | 23739  | OR031839 | 20411  | 20924  |
| 406 | MW879162 | 25066  | 25573  | OR031839 | 22392  | 22899  |
| 407 | MW879162 | 11835  | 12347  | OR031839 | 8825   | 9337   |
| 408 | MW879162 | 17554  | 18080  | OR031839 | 14587  | 15113  |
| 409 | MW879162 | 18638  | 19192  | OR031839 | 15671  | 16225  |
| 410 | MW879162 | 4732   | 5361   | OR031839 | 1950   | 2579   |
| 411 | MW879162 | 3015   | 3804   | OR031839 | 44     | 833    |
| 412 | OR031839 | 13802  | 14588  | MW879162 | 16778  | 17564  |
| 413 | MW879162 | 25610  | 26331  | OR031839 | 22912  | 23633  |
| 414 | MW879162 | 2185   | 2847   | OR031839 | 29540  | 30202  |

|     |          |       |       |          |       |       |
|-----|----------|-------|-------|----------|-------|-------|
| 415 | NC037409 | 25064 | 25365 | OR031839 | 20928 | 21229 |
| 416 | NC037409 | 25064 | 25365 | MW879162 | 23742 | 24043 |
| 417 | MW879162 | 23742 | 24043 | OR031839 | 20928 | 21229 |
| 418 | MW879162 | 1879  | 2194  | OR031839 | 29233 | 29548 |
| 419 | MW879162 | 4235  | 4555  | OR031839 | 1410  | 1730  |
| 420 | MW879162 | 18068 | 18404 | OR031839 | 15104 | 15440 |
| 421 | MW879162 | 14146 | 14487 | OR031839 | 11139 | 11480 |
| 422 | MW879162 | 22883 | 23224 | OR031839 | 20062 | 20403 |
| 423 | MW879162 | 10843 | 11192 | OR031839 | 7969  | 8318  |
| 424 | MW879162 | 11388 | 11749 | OR031839 | 8439  | 8800  |
| 425 | MW879162 | 26359 | 26724 | OR031839 | 23655 | 24020 |
| 426 | MW879162 | 10200 | 10576 | OR031839 | 7262  | 7638  |
| 427 | NC037409 | 24677 | 25059 | MW879162 | 23354 | 23736 |
| 428 | NC037409 | 24677 | 25059 | OR031839 | 20539 | 20921 |
| 429 | MW879162 | 23354 | 23736 | OR031839 | 20539 | 20921 |
| 430 | MW879162 | 9125  | 9519  | OR031839 | 6197  | 6591  |
| 431 | MW879162 | 20348 | 20757 | OR031839 | 17488 | 17897 |
| 432 | MW879162 | 19687 | 20118 | OR031839 | 16787 | 17218 |
| 433 | MW879162 | 23738 | 24158 | OR031839 | 20924 | 21344 |
| 434 | MW879162 | 21722 | 22134 | OR031839 | 18882 | 19294 |
| 435 | MW879162 | 8388  | 8720  | OR031839 | 5424  | 5756  |
| 436 | MW879162 | 25042 | 25366 | OR031839 | 22368 | 22692 |
| 437 | MW879162 | 21017 | 21337 | OR031839 | 18179 | 18499 |

**Table S2.** The list of simple sequences repeats of the *Gastrodia pubilabiata*'s plastome.

| Name                   | Start | End   | Sequence     | Unit |
|------------------------|-------|-------|--------------|------|
| Mononucleotide Repeat  | 4570  | 4583  | TTTTTTTTTTTT | T    |
| Mononucleotide Repeat  | 25904 | 25916 | TTTTTTTTTTTT | T    |
| Mononucleotide Repeat  | 4144  | 4155  | AAAAAAAAAAAA | A    |
| Mononucleotide Repeat  | 7663  | 7674  | TTTTTTTTTTTT | T    |
| Mononucleotide Repeat  | 23890 | 23901 | TTTTTTTTTTTT | T    |
| Mononucleotide Repeat  | 25353 | 25364 | TTTTTTTTTTTT | T    |
| Mononucleotide Repeat  | 6629  | 6639  | TTTTTTTTTTTT | T    |
| Mononucleotide Repeat  | 12742 | 12752 | TTTTTTTTTTTT | T    |
| Mononucleotide Repeat  | 13744 | 13754 | TTTTTTTTTTTT | T    |
| Mononucleotide Repeat  | 29237 | 29247 | AAAAAAAAAAAA | A    |
| Mononucleotide Repeat  | 29539 | 29549 | AAAAAAAAAAAA | A    |
| Mononucleotide Repeat  | 6097  | 6106  | TTTTTTTTTT   | T    |
| Mononucleotide Repeat  | 16551 | 16560 | TTTTTTTTTT   | T    |
| Mononucleotide Repeat  | 19886 | 19895 | AAAAAAAAAAAA | A    |
| Mononucleotide Repeat  | 26790 | 26799 | TTTTTTTTTT   | T    |
| Mononucleotide Repeat  | 29746 | 29755 | AAAAAAAAAAAA | A    |
| Dinucleotide Repeat    | 27425 | 27437 | TATATATATATA | TA   |
| Dinucleotide Repeat    | 13457 | 13468 | TATATATATATA | TA   |
| Dinucleotide Repeat    | 1282  | 1292  | TATATATATA   | TA   |
| Dinucleotide Repeat    | 24470 | 24480 | TATATATATA   | TA   |
| Dinucleotide Repeat    | 9430  | 9439  | TATATATATA   | TA   |
| Trinucleotide Repeat   | 6168  | 6180  | TATTATTATTAT | TAT  |
| Trinucleotide Repeat   | 15101 | 15113 | TATTATTATTAT | TAT  |
| Trinucleotide Repeat   | 30448 | 30460 | ATAATAATAATA | ATA  |
| Trinucleotide Repeat   | 30467 | 30479 | ATAATAATAATA | ATA  |
| Tetranucleotide Repeat | 6140  | 6152  | TATTTATTTATT | TATT |
| Tetranucleotide Repeat | 10504 | 10516 | AGATAGATAGAT | AGAT |
| Tetranucleotide Repeat | 13674 | 13686 | AAATAAATAAAT | AAAT |
| Tetranucleotide Repeat | 27408 | 27420 | TATTTATTTATT | TATT |
| Tetranucleotide Repeat | 28325 | 28337 | ATTTATTTATT  | ATTT |
| Tetranucleotide Repeat | 29150 | 29162 | AAATAAATAAAT | AAAT |
| Tetranucleotide Repeat | 11859 | 11870 | TAAATAAATAAA | TAAA |
| Tetranucleotide Repeat | 18011 | 18022 | ACCTACCTACCT | ACCT |
| Tetranucleotide Repeat | 19685 | 19696 | TTATTTATTAT  | TTAT |
| Tetranucleotide Repeat | 25474 | 25485 | ATAAATAAATAA | ATAA |
| Tetranucleotide Repeat | 27382 | 27393 | TTATTTATTAT  | TTAT |
| Tetranucleotide Repeat | 27444 | 27455 | TTATTTATTAT  | TTAT |
| Tetranucleotide Repeat | 27475 | 27486 | TTATTTATTAT  | TTAT |

|                        |       |       |                      |       |
|------------------------|-------|-------|----------------------|-------|
| Pentanucleotide Repeat | 27497 | 27517 | TTATATTATATTATATTATA | TTATA |
| Pentanucleotide Repeat | 21618 | 21635 | ATAAAATAAAATAAA      | ATAAA |
| Pentanucleotide Repeat | 21642 | 21659 | ATAAAATAAAATAAA      | ATAAA |
| Pentanucleotide Repeat | 21666 | 21683 | ATAAAATAAAATAAA      | ATAAA |
| Pentanucleotide Repeat | 21690 | 21707 | ATAAAATAAAATAAA      | ATAAA |
| Pentanucleotide Repeat | 10836 | 10852 | TTTATTTTATTTTAT      | TTTAT |
| Pentanucleotide Repeat | 5067  | 5081  | TTATATTATATTATA      | TTATA |
| Pentanucleotide Repeat | 7174  | 7188  | CTTTACTTTACTTTA      | CTTTA |
| Pentanucleotide Repeat | 27196 | 27210 | TATTTTATTTTATTT      | TATTT |
| Pentanucleotide Repeat | 27587 | 27601 | TTATTTTATTTTATT      | TTATT |
| Pentanucleotide Repeat | 11010 | 11023 | TTATATTATA           | TTATA |
| Pentanucleotide Repeat | 23880 | 23893 | TTTTATTTTA           | TTTTA |
| Pentanucleotide Repeat | 5797  | 5809  | TTTACTTTAC           | TTTAC |
| Pentanucleotide Repeat | 8209  | 8221  | ATTTTATTTT           | ATTTT |
| Pentanucleotide Repeat | 12052 | 12064 | TTTATTTTAT           | TTTAT |
| Pentanucleotide Repeat | 22909 | 22921 | TTTATTTTAT           | TTTAT |
| Pentanucleotide Repeat | 27353 | 27365 | TATTATATTA           | TATTA |
| Pentanucleotide Repeat | 30291 | 30303 | ATATAATATA           | ATATA |
| Pentanucleotide Repeat | 1200  | 1211  | ATTATATTAT           | ATTAT |
| Pentanucleotide Repeat | 1253  | 1264  | ATTATATTAT           | ATTAT |
| Pentanucleotide Repeat | 5149  | 5160  | TTAATTTAAT           | TTAAT |
| Pentanucleotide Repeat | 5210  | 5221  | TTTAATTTAA           | TTTAA |
| Pentanucleotide Repeat | 5852  | 5863  | TTTTATTTTA           | TTTTA |
| Pentanucleotide Repeat | 6445  | 6456  | ATTTGATTTG           | ATTTG |
| Pentanucleotide Repeat | 6985  | 6996  | TTTATTTTAT           | TTTAT |
| Pentanucleotide Repeat | 7207  | 7218  | TAAAATAAAA           | TAAAA |
| Pentanucleotide Repeat | 15856 | 15867 | TAAATTAAAT           | TAAAT |
| Pentanucleotide Repeat | 15941 | 15952 | TAAAATAAAA           | TAAAA |
| Pentanucleotide Repeat | 17468 | 17479 | TATTATATTA           | TATTA |
| Pentanucleotide Repeat | 26074 | 26085 | ATTATATTAT           | ATTAT |
| Pentanucleotide Repeat | 30314 | 30325 | TATAATATAA           | TATAA |
| Pentanucleotide Repeat | 828   | 838   | AAATAAAATA           | AAATA |
| Pentanucleotide Repeat | 1269  | 1279  | TTATATTATA           | TTATA |
| Pentanucleotide Repeat | 1320  | 1330  | TATTTTATTT           | TATTT |
| Pentanucleotide Repeat | 2030  | 2040  | TTATTTTATT           | TTATT |
| Pentanucleotide Repeat | 2696  | 2706  | AAAATAAAAT           | AAAAT |
| Pentanucleotide Repeat | 3862  | 3872  | TTTTATTTTA           | TTTTA |
| Pentanucleotide Repeat | 4727  | 4737  | TTAATTTAAT           | TTAAT |
| Pentanucleotide Repeat | 6088  | 6098  | TATATTATAT           | TATAT |
| Pentanucleotide Repeat | 7732  | 7742  | TAATATAATA           | TAATA |
| Pentanucleotide Repeat | 8318  | 8328  | TCTTGTCTTG           | TCTTG |

|                        |       |       |            |       |
|------------------------|-------|-------|------------|-------|
| Pentanucleotide Repeat | 8799  | 8809  | ATATTATATT | ATATT |
| Pentanucleotide Repeat | 10735 | 10745 | ATAATATAAT | ATAAT |
| Pentanucleotide Repeat | 15084 | 15094 | TATATTATAT | TATAT |
| Pentanucleotide Repeat | 15323 | 15333 | TTTCGTTTCG | TTTCG |
| Pentanucleotide Repeat | 15954 | 15964 | AATAAAATAA | AATAA |
| Pentanucleotide Repeat | 17030 | 17040 | CAACCCAACC | CAACC |
| Pentanucleotide Repeat | 18257 | 18267 | AAAATAAAAT | AAAAT |
| Pentanucleotide Repeat | 23667 | 23677 | GTAATGTAAT | GTAAT |
| Pentanucleotide Repeat | 27345 | 27355 | TATTATATTA | TATTA |
| Pentanucleotide Repeat | 27610 | 27620 | TTATTTTATT | TTATT |

**Table S3.** Summarized BLASTN results of putative gene transfers.

| Region | Mitogenome counts | Plastome counts | Organelle  |
|--------|-------------------|-----------------|------------|
| 112350 | 12                | 2028            | mitogenome |
| 344550 | 70                | 2020            | mitogenome |
| 531300 | 2                 | 1988            | mitogenome |
| 501750 | 98                | 1986            | mitogenome |
| 381900 | 578               | 1984            | mitogenome |
| 723150 | 552               | 1978            | mitogenome |

|        |     |      |            |
|--------|-----|------|------------|
| 381300 | 568 | 1974 | mitogenome |
| 864000 | 540 | 1970 | mitogenome |
| 154950 | 528 | 1950 | mitogenome |
| 848700 | 508 | 1932 | mitogenome |
| 617400 | 48  | 1862 | mitogenome |
| 400200 | 332 | 998  | mitogenome |
| 698250 | 332 | 998  | mitogenome |
| 636300 | 52  | 998  | mitogenome |
| 136500 | 42  | 998  | mitogenome |
| 312900 | 42  | 998  | mitogenome |
| 636450 | 32  | 998  | mitogenome |
| 637200 | 24  | 998  | mitogenome |
| 636900 | 18  | 998  | mitogenome |
| 569700 | 18  | 998  | mitogenome |
| 213300 | 4   | 998  | mitogenome |
| 399450 | 0   | 998  | mitogenome |
| 617550 | 0   | 650  | mitogenome |
| 781500 | 0   | 394  | mitogenome |
| 261000 | 2   | 310  | mitogenome |
| 637050 | 0   | 212  | mitogenome |
| 212550 | 0   | 170  | mitogenome |
| 213000 | 0   | 146  | mitogenome |
| 505500 | 0   | 120  | mitogenome |
| 152550 | 548 | 44   | mitogenome |
| 381450 | 480 | 32   | mitogenome |
| 849000 | 652 | 18   | mitogenome |
| 153150 | 534 | 14   | mitogenome |
| 382800 | 504 | 14   | mitogenome |
| 382350 | 498 | 14   | mitogenome |
| 381750 | 478 | 14   | mitogenome |
| 344400 | 0   | 14   | mitogenome |
| 535050 | 370 | 12   | mitogenome |
| 601950 | 298 | 12   | mitogenome |
| 619500 | 296 | 12   | mitogenome |
| 260850 | 0   | 12   | mitogenome |
| 381000 | 614 | 10   | mitogenome |
| 723750 | 484 | 10   | mitogenome |
| 848850 | 482 | 10   | mitogenome |
| 381150 | 434 | 10   | mitogenome |



|        |     |    |            |
|--------|-----|----|------------|
| 509550 | 424 | 10 | mitogenome |
| 848550 | 406 | 10 | mitogenome |
| 381600 | 400 | 10 | mitogenome |
| 722550 | 362 | 10 | mitogenome |
| 722700 | 338 | 10 | mitogenome |
| 863400 | 312 | 10 | mitogenome |
| 766200 | 4   | 10 | mitogenome |
| 152700 | 550 | 8  | mitogenome |
| 153300 | 538 | 8  | mitogenome |
| 382500 | 496 | 8  | mitogenome |
| 863250 | 394 | 8  | mitogenome |
| 863850 | 366 | 8  | mitogenome |
| 722850 | 354 | 8  | mitogenome |
| 160650 | 282 | 8  | mitogenome |
| 863700 | 266 | 8  | mitogenome |
| 563100 | 256 | 8  | mitogenome |
| 136050 | 0   | 6  | mitogenome |
| 313500 | 0   | 6  | mitogenome |
| 21300  | 550 | 4  | mitogenome |
| 154350 | 546 | 4  | mitogenome |
| 154050 | 534 | 4  | mitogenome |
| 153000 | 532 | 4  | mitogenome |
| 152850 | 530 | 4  | mitogenome |
| 153450 | 528 | 4  | mitogenome |
| 116400 | 526 | 4  | mitogenome |
| 371700 | 456 | 4  | mitogenome |
| 864450 | 380 | 4  | mitogenome |
| 534600 | 372 | 4  | mitogenome |
| 162450 | 324 | 4  | mitogenome |
| 866850 | 310 | 4  | mitogenome |
| 866700 | 276 | 4  | mitogenome |
| 867000 | 248 | 4  | mitogenome |
| 866550 | 246 | 4  | mitogenome |
| 265800 | 590 | 2  | mitogenome |
| 524100 | 554 | 2  | mitogenome |
| 152400 | 550 | 2  | mitogenome |
| 509100 | 540 | 2  | mitogenome |
| 375750 | 514 | 2  | mitogenome |
| 483600 | 504 | 2  | mitogenome |

|        |     |      |            |
|--------|-----|------|------------|
| 154200 | 492 | 2    | mitogenome |
| 525300 | 428 | 2    | mitogenome |
| 154500 | 422 | 2    | mitogenome |
| 286950 | 420 | 2    | mitogenome |
| 152250 | 418 | 2    | mitogenome |
| 668400 | 410 | 2    | mitogenome |
| 849150 | 406 | 2    | mitogenome |
| 601800 | 398 | 2    | mitogenome |
| 374250 | 394 | 2    | mitogenome |
| 162750 | 366 | 2    | mitogenome |
| 827250 | 364 | 2    | mitogenome |
| 382650 | 362 | 2    | mitogenome |
| 514350 | 356 | 2    | mitogenome |
| 745500 | 356 | 2    | mitogenome |
| 723900 | 350 | 2    | mitogenome |
| 517650 | 344 | 2    | mitogenome |
| 517800 | 344 | 2    | mitogenome |
| 514500 | 336 | 2    | mitogenome |
| 525150 | 328 | 2    | mitogenome |
| 843600 | 314 | 2    | mitogenome |
| 843000 | 308 | 2    | mitogenome |
| 587400 | 308 | 2    | mitogenome |
| 508200 | 306 | 2    | mitogenome |
| 843300 | 306 | 2    | mitogenome |
| 815100 | 298 | 2    | mitogenome |
| 745800 | 296 | 2    | mitogenome |
| 745950 | 294 | 2    | mitogenome |
| 843450 | 276 | 2    | mitogenome |
| 707850 | 228 | 2    | mitogenome |
| 266250 | 226 | 2    | mitogenome |
| 267900 | 180 | 2    | mitogenome |
| 21150  | 166 | 2    | mitogenome |
| 511500 | 144 | 2    | mitogenome |
| 759000 | 144 | 2    | mitogenome |
| 163050 | 130 | 2    | mitogenome |
| 116100 | 128 | 2    | mitogenome |
| 511650 | 124 | 2    | mitogenome |
| 21450  | 41  | 8792 | Plastome   |
| 19200  | 46  | 8606 | Plastome   |

|       |     |      |          |
|-------|-----|------|----------|
| 18300 | 27  | 7521 | Plastome |
| 16950 | 45  | 5302 | Plastome |
| 20100 | 39  | 5293 | Plastome |
| 20400 | 30  | 5277 | Plastome |
| 17700 | 40  | 5237 | Plastome |
| 20550 | 249 | 5201 | Plastome |
| 17550 | 41  | 5196 | Plastome |
| 17100 | 36  | 5193 | Plastome |
| 18900 | 50  | 5179 | Plastome |
| 21000 | 39  | 5173 | Plastome |
| 20250 | 36  | 5151 | Plastome |
| 19950 | 28  | 5004 | Plastome |
| 21150 | 36  | 4910 | Plastome |
| 27900 | 32  | 4687 | Plastome |
| 11250 | 18  | 3616 | Plastome |
| 6150  | 8   | 2954 | Plastome |
| 13950 | 2   | 1068 | Plastome |
| 20700 | 2   | 1035 | Plastome |
| 3000  | 2   | 628  | Plastome |
| 16050 | 9   | 325  | Plastome |
| 9000  | 2   | 44   | Plastome |

**Table S4.** The NGS results of *Gastrodia pubilabiata* with two different methods (NovaSeq and Pacbio Sequel).

| Method                  | NovaSeq        | Pacbio sequel |
|-------------------------|----------------|---------------|
| Number of reads         | 224,926,562    | 746,493       |
| Number of bases         | 33,963,910,862 | 3,883,634,904 |
| Number of trimmed reads | 224,926,562    | 168,074       |
| Number of trimmed bases | 32,230,907,981 | 728,627,957   |
| Voucher specimen        | 2020-0086      | 2020-0086     |

**Table S5.** The depth-coverage of mitogenomes of *Gastrodia pubilabiata*.

| Mitogenome | Length | Depth | Mitogenome | Length | Depth |
|------------|--------|-------|------------|--------|-------|
| OR004100   | 64,159 | 566.5 | OR004122   | 17,020 | 57.4  |
| OR004101   | 55,369 | 588.2 | OR004123   | 16,000 | 93.7  |
| OR004102   | 51,695 | 70.6  | OR004124   | 15,716 | 60    |
| OR004103   | 50,872 | 68.4  | OR004125   | 15,367 | 53.2  |
| OR004104   | 40,269 | 55.9  | OR004126   | 15,363 | 62.2  |
| OR004105   | 30,820 | 175.1 | OR004127   | 15,299 | 332.8 |

|          |        |       |          |        |       |
|----------|--------|-------|----------|--------|-------|
| OR004106 | 26,177 | 102.7 | OR004128 | 14,604 | 627.2 |
| OR004107 | 25,386 | 78.2  | OR004129 | 14,457 | 48.8  |
| OR004108 | 23,997 | 68.5  | OR004130 | 13,960 | 58.9  |
| OR004109 | 23,795 | 400.5 | OR004131 | 12,366 | 215   |
| OR004110 | 23,203 | 60.4  | OR004132 | 12,304 | 52.5  |
| OR004111 | 22,560 | 54.4  | OR004133 | 12,137 | 56.8  |
| OR004112 | 21,174 | 54.8  | OR004134 | 12,001 | 55.5  |
| OR004113 | 21,009 | 77.1  | OR004135 | 10,912 | 214.3 |
| OR004114 | 20,400 | 53.5  | OR004136 | 10,833 | 58.6  |
| OR004115 | 19,639 | 90    | OR004137 | 10,196 | 81.8  |
| OR004116 | 18,952 | 61.6  | OR004138 | 5,102  | 430.2 |
| OR004117 | 18,932 | 60.1  | OR004139 | 4,510  | 40.1  |
| OR004118 | 18,639 | 59.7  | OR004140 | 3,750  | 135.1 |
| OR004119 | 17,862 | 147.6 | OR004141 | 3,420  | 73    |
| OR004120 | 17,267 | 61    | OR004142 | 1,438  | 220.9 |
| OR004121 | 17,047 | 74.3  | OR004143 | 1,371  | 542.9 |

**Table S6.** Used sequences information in this study.

| Scientific Name             | Accession | Organelle  |
|-----------------------------|-----------|------------|
| <i>Acer miaotaiense</i>     | MZ636518  | Mitogenome |
| <i>Aconitum kusnezoffii</i> | NC053920  | Mitogenome |
| <i>Ajuga reptans</i>        | NC023103  | Mitogenome |
| <i>Allium cepa</i>          | NC030100  | Mitogenome |
| <i>Arabidopsis thaliana</i> | NC037304  | Mitogenome |

|                                            |                       |            |
|--------------------------------------------|-----------------------|------------|
| <i>Asclepias syriaca</i>                   | NC022796              | Mitogenome |
| <i>Asparagus officinalis</i>               | NC053642              | Mitogenome |
| <i>Beta macrocarpa</i>                     | FQ378026              | Mitogenome |
| <i>Betula pendula</i>                      | LT855379              | Mitogenome |
| <i>Bombax ceiba</i>                        | NC038052              | Mitogenome |
| <i>Butomus umbellatus</i>                  | NC021399              | Mitogenome |
| <i>Camellia sinensis</i>                   | NC043914              | Mitogenome |
| <i>Capsicum annuum</i>                     | NC024624              | Mitogenome |
| <i>Cycas taitungensis</i>                  | NC010303              | Mitogenome |
| <i>Daucus carota</i> subsp. <i>sativus</i> | NC017855              | Mitogenome |
| <i>Eucalyptus grandis</i>                  | NC040010              | Mitogenome |
| <i>Euonymus alatus</i>                     | NC053921              | Mitogenome |
| <i>Fagus sylvatica</i>                     | NC050960              | Mitogenome |
| <i>Gastrodia elata</i>                     | MF070084              | Mitogenome |
| <i>Gastrodia elata</i>                     | MF070085              | Mitogenome |
| <i>Gastrodia elata</i>                     | MF070086              | Mitogenome |
| <i>Gastrodia elata</i>                     | MF070087              | Mitogenome |
| <i>Gastrodia elata</i>                     | MF070088              | Mitogenome |
| <i>Gastrodia elata</i>                     | MF070089              | Mitogenome |
| <i>Gastrodia elata</i>                     | MF070090              | Mitogenome |
| <i>Gastrodia elata</i>                     | MF070091              | Mitogenome |
| <i>Gastrodia elata</i>                     | MF070092              | Mitogenome |
| <i>Gastrodia elata</i>                     | MF070093              | Mitogenome |
| <i>Gastrodia elata</i>                     | MF070094              | Mitogenome |
| <i>Gastrodia elata</i>                     | MF070095              | Mitogenome |
| <i>Gastrodia elata</i>                     | MF070096              | Mitogenome |
| <i>Gastrodia elata</i>                     | MF070097              | Mitogenome |
| <i>Gastrodia elata</i>                     | MF070098              | Mitogenome |
| <i>Gastrodia elata</i>                     | MF070099              | Mitogenome |
| <i>Gastrodia elata</i>                     | MF070100              | Mitogenome |
| <i>Gastrodia elata</i>                     | MF070101              | Mitogenome |
| <i>Gastrodia elata</i>                     | MF070102              | Mitogenome |
| <i>Gastrodia pubilabiata</i>               | OR004100-<br>OR004143 | Mitogenome |
| <i>Geranium maderense</i>                  | NC027000              | Mitogenome |
| <i>Ginkgo biloba</i>                       | NC027976              | Mitogenome |
| <i>Glycine soja</i>                        | NC039768              | Mitogenome |
| <i>Hibiscus cannabinus</i>                 | NC035549              | Mitogenome |
| <i>Ilex pubescens</i>                      | MK714017              | Mitogenome |
| <i>Luffa acutangula</i>                    | NC050067              | Mitogenome |

|                                  |          |            |
|----------------------------------|----------|------------|
| <i>Magnolia biondii</i>          | NC049134 | Mitogenome |
| <i>Manihot esculenta</i>         | NC045136 | Mitogenome |
| <i>Nelumbo nucifera</i>          | NC030753 | Mitogenome |
| <i>Nitraria tangutorum</i>       | MK431824 | Mitogenome |
| <i>Nymphaea colorata</i>         | NC037468 | Mitogenome |
| <i>Ophioglossum californicum</i> | NC030900 | Mitogenome |
| <i>Oryza sativa</i>              | NC011033 | Mitogenome |
| <i>Phlegmariurus squarrosus</i>  | NC017755 | Mitogenome |
| <i>Phoenix dactylifera</i>       | NC016740 | Mitogenome |
| <i>Pinus taeda</i>               | NC039746 | Mitogenome |
| <i>Platycodon grandiflorus</i>   | NC035958 | Mitogenome |
| <i>Prunus avium</i>              | NC044768 | Mitogenome |
| <i>Schisandra sphenanthera</i>   | NC042758 | Mitogenome |
| <i>Spondias mombin</i>           | NC045035 | Mitogenome |
| <i>Tetracentron sinense</i>      | CM026581 | Mitogenome |
| <i>Viscum album</i>              | NC029039 | Mitogenome |
| <i>Vitis vinifera</i>            | NC012119 | Mitogenome |
| <i>Zelkova schneideriana</i>     | MW717907 | Mitogenome |
| <i>Abatia parviflora</i>         | MN078139 | Plastome   |
| <i>Acer pseudosieboldianum</i>   | NC046487 | Plastome   |
| <i>Aleurites moluccanus</i>      | MW322810 | Plastome   |
| <i>Allium cepa</i>               | KM088013 | Plastome   |
| <i>Allium cepa</i>               | KM088013 | Plastome   |
| <i>Amborella trichopoda</i>      | NC005086 | Plastome   |
| <i>Amitostigma gracile</i>       | MN200376 | Plastome   |
| <i>Anoectochilus emeiensis</i>   | NC033895 | Plastome   |
| <i>Aphyllorchis montana</i>      | NC030703 | Plastome   |
| <i>Apostasia odorata</i>         | NC030722 | Plastome   |
| <i>Apostasia wallichii</i>       | NC036260 | Plastome   |
| <i>Arisaema erubescens</i>       | NC051541 | Plastome   |
| <i>Aristotelia chilensis</i>     | MT078232 | Plastome   |
| <i>Aspidopterys concava</i>      | OL471043 | Plastome   |
| <i>Aspidopterys obcordata</i>    | NC049898 | Plastome   |
| <i>Averrhoa bilimbi</i>          | MT522015 | Plastome   |
| <i>Averrhoa carambola</i>        | NC033350 | Plastome   |
| <i>Azara serrata</i>             | NC041433 | Plastome   |
| <i>Baccaurea ramiflora</i>       | NC057309 | Plastome   |
| <i>Balakata baccata</i>          | NC057049 | Plastome   |
| <i>Banara guianensis</i>         | NC043896 | Plastome   |

|                                                       |          |          |
|-------------------------------------------------------|----------|----------|
| <i>Bennettiodendron brevipes</i>                      | NC043885 | Plastome |
| <i>Bennettiodendron leprosipes</i>                    | NC045898 | Plastome |
| <i>Biophytum sensitivum</i>                           | MT522017 | Plastome |
| <i>Bischofia polycarpa</i>                            | MZ826267 | Plastome |
| <i>Bletilla striata</i>                               | NC028422 | Plastome |
| <i>Boehmeria spicata</i>                              | NC036989 | Plastome |
| <i>Brassica juncea</i>                                | NC028272 | Plastome |
| <i>Breynia fruticosa</i>                              | NC058018 | Plastome |
| <i>Bridelia tomentosa</i>                             | MW357611 | Plastome |
| <i>Bulbophyllum inconspicuum</i>                      | MN200377 | Plastome |
| <i>Bunchosia argentea</i>                             | NC041491 | Plastome |
| <i>Byrsonima coccolobifolia</i>                       | NC037191 | Plastome |
| <i>Byrsonima crassifolia</i>                          | NC037192 | Plastome |
| <i>Calanthe aristulifera</i>                          | MN200378 | Plastome |
| <i>Calypso bulbosa</i> var. <i>occidentalis</i>       | NC040980 | Plastome |
| <i>Carex neurocarpa</i>                               | NC036037 | Plastome |
| <i>Carpinus tschonoskii</i>                           | NC039938 | Plastome |
| <i>Carrierea calycina</i>                             | NC043884 | Plastome |
| <i>Casearia decandra</i>                              | MN078142 | Plastome |
| <i>Casearia glomerata</i>                             | NC059787 | Plastome |
| <i>Casearia velutina</i>                              | MN078141 | Plastome |
| <i>Catha edulis</i>                                   | KT861471 | Plastome |
| <i>Cattleya crispata</i>                              | NC026568 | Plastome |
| <i>Celastrus orbiculatus</i>                          | MW316708 | Plastome |
| <i>Cephalanthera longifolia</i>                       | NC030704 | Plastome |
| <i>Cinnamomum camphora</i>                            | NC035882 | Plastome |
| <i>Cleidiocarpon cavaleriei</i>                       | MG813873 | Plastome |
| <i>Cleidion brevipetiolatum</i>                       | OL804290 | Plastome |
| <i>Clematis mandshurica</i>                           | OK375873 | Plastome |
| <i>Cnidoscolus aconitifolius</i>                      | MZ045411 | Plastome |
| <i>Corallorhiza bulbosa</i>                           | NC025659 | Plastome |
| <i>Corallorhiza macrantha</i>                         | NC025660 | Plastome |
| <i>Corallorhiza maculata</i>                          | MN200380 | Plastome |
| <i>Corallorhiza maculata</i> var. <i>maculata</i>     | KM390014 | Plastome |
| <i>Corallorhiza maculata</i> var. <i>mexicana</i>     | KM390015 | Plastome |
| <i>Corallorhiza maculata</i> var. <i>occidentalis</i> | KM390016 | Plastome |
| <i>Corallorhiza mertensiana</i>                       | NC025661 | Plastome |
| <i>Corallorhiza odontorhiza</i>                       | NC025664 | Plastome |
| <i>Corallorhiza striata</i> var. <i>vreelandii</i>    | JX087681 | Plastome |



|                                                      |          |          |
|------------------------------------------------------|----------|----------|
| <i>Corallorhiza trifida</i>                          | NC025662 | Plastome |
| <i>Corallorhiza wisteriana</i>                       | NC025663 | Plastome |
| <i>Cornus walteri</i>                                | NC058318 | Plastome |
| <i>Cratoxylum cochinchinense</i>                     | MT424754 | Plastome |
| <i>Cremastra unguiculata</i>                         | MN200381 | Plastome |
| <i>Croton laevigatus</i>                             | MN713923 | Plastome |
| <i>Croton tiglium</i>                                | NC040113 | Plastome |
| <i>Cryptomeria japonica</i>                          | NC010548 | Plastome |
| <i>Cymbidium macrorhizon</i>                         | KY354040 | Plastome |
| <i>Cypripedium formosanum</i>                        | NC026772 | Plastome |
| <i>Cypripedium japonicum</i>                         | NC027227 | Plastome |
| <i>Cyrtosia septentrionalis</i>                      | MH615835 | Plastome |
| <i>Dactylorhiza viridis</i> var. <i>coreana</i>      | MN200382 | Plastome |
| <i>Danxiaorchis singchiana</i>                       | NC048523 | Plastome |
| <i>Dendrobium moniliforme</i>                        | MN200384 | Plastome |
| <i>Deutzianthus tonkinensis</i>                      | NC041102 | Plastome |
| <i>Dianyuea turbinata</i>                            | NC054283 | Plastome |
| <i>Dipodium roseum</i>                               | MN200386 | Plastome |
| <i>Dovyalis caffra</i>                               | MN078137 | Plastome |
| <i>Dryopteris crassirhizoma</i>                      | NC050008 | Plastome |
| <i>Elaeocarpus angustifolius</i>                     | MW242787 | Plastome |
| <i>Elaeocarpus braceanus</i>                         | NC054266 | Plastome |
| <i>Elaeocarpus decipiens</i>                         | NC058624 | Plastome |
| <i>Elaeocarpus glabripetalus</i>                     | MW900186 | Plastome |
| <i>Elaeocarpus japonicus</i>                         | NC053654 | Plastome |
| <i>Elaeocarpus japonicus</i> var. <i>yunnanensis</i> | MW242788 | Plastome |
| <i>Elaeocarpus sylvestris</i>                        | MW196271 | Plastome |
| <i>Elleanthus sodiroi</i>                            | NC027266 | Plastome |
| <i>Epipactis thunbergii</i>                          | MN200387 | Plastome |
| <i>Epipogium aphyllum</i>                            | NC026449 | Plastome |
| <i>Epipogium roseum</i>                              | NC026448 | Plastome |
| <i>Erycina pusilla</i>                               | NC018114 | Plastome |
| <i>Erythroxylum novogranatense</i>                   | NC030601 | Plastome |
| <i>Eulophia zollingeri</i>                           | NC037212 | Plastome |
| <i>Euonymus alatus</i>                               | OK562424 | Plastome |
| <i>Euonymus europaeus</i>                            | MZ567072 | Plastome |
| <i>Euonymus fortunei</i>                             | NC057058 | Plastome |
| <i>Euonymus hamiltonianus</i>                        | NC037518 | Plastome |
| <i>Euonymus japonicus</i>                            | NC028067 | Plastome |

|                               |          |          |
|-------------------------------|----------|----------|
| <i>Euonymus maackii</i>       | MW771518 | Plastome |
| <i>Euonymus maackii</i>       | NC057059 | Plastome |
| <i>Euonymus phellomanus</i>   | NC057060 | Plastome |
| <i>Euonymus schensianus</i>   | NC036019 | Plastome |
| <i>Euonymus szechuanensis</i> | NC047463 | Plastome |
| <i>Euonymus yunnanensis</i>   | MW770452 | Plastome |
| <i>Euphorbia ebracteolata</i> | NC052747 | Plastome |
| <i>Euphorbia esula</i>        | NC033910 | Plastome |
| <i>Euphorbia helioscopia</i>  | MN199031 | Plastome |
| <i>Euphorbia hirta</i>        | NC058203 | Plastome |
| <i>Euphorbia jolkinii</i>     | LC661698 | Plastome |
| <i>Euphorbia kansuensis</i>   | MZ962400 | Plastome |
| <i>Euphorbia kansui</i>       | MH392274 | Plastome |
| <i>Euphorbia larica</i>       | MN646683 | Plastome |
| <i>Euphorbia lathyris</i>     | NC052746 | Plastome |
| <i>Euphorbia maculata</i>     | NC052745 | Plastome |
| <i>Euphorbia micractina</i>   | OL622067 | Plastome |
| <i>Euphorbia milii</i>        | MN713924 | Plastome |
| <i>Euphorbia pekinensis</i>   | NC058897 | Plastome |
| <i>Euphorbia peplus</i>       | NC058989 | Plastome |
| <i>Euphorbia smithii</i>      | MN646684 | Plastome |
| <i>Euphorbia tirucalli</i>    | NC042193 | Plastome |
| <i>Eurya alata</i>            | NC041510 | Plastome |
| <i>Eurystyles cotyledon</i>   | NC047204 | Plastome |
| <i>Eustrephus latifolius</i>  | NC025305 | Plastome |
| <i>Excoecaria agallocha</i>   | MZ687828 | Plastome |
| <i>Flacourtia indica</i>      | NC037410 | Plastome |
| <i>Flacourtia inermis</i>     | MN078138 | Plastome |
| <i>Flacourtia jangomas</i>    | NC046687 | Plastome |
| <i>Flacourtia rukam</i>       | NC045859 | Plastome |
| <i>Flueggea virosa</i>        | NC051502 | Plastome |
| <i>Fritillaria hupehensis</i> | NC024736 | Plastome |
| <i>Galearis cyclochila</i>    | MN200388 | Plastome |
| <i>Galphimia angustifolia</i> | NC043795 | Plastome |
| <i>Garcinia subelliptica</i>  | NC059006 | Plastome |
| <i>Gastrochilus japonicus</i> | NC035833 | Plastome |
| <i>Gastrodia elata</i>        | MN200389 | Plastome |
| <i>Gastrodia elata</i>        | NC037409 | Plastome |
| <i>Gastrodia longistyla</i>   | MW879162 | Plastome |

|                                  |          |          |
|----------------------------------|----------|----------|
| <i>Gastrodia pubilabiata</i>     | OR031839 | Plastome |
| <i>Geranium sibiricum</i>        | NC056382 | Plastome |
| <i>Ginkgo biloba</i>             | MN443423 | Plastome |
| <i>Glochidion chodoense</i>      | NC042906 | Plastome |
| <i>Goodyera rosulacea</i>        | MN200390 | Plastome |
| <i>Gymnadenia conopsea</i>       | MN200391 | Plastome |
| <i>Habenaria radiata</i>         | NC035834 | Plastome |
| <i>Hetaeria sikokiana</i>        | MN200367 | Plastome |
| <i>Hevea benthamiana</i>         | MT333859 | Plastome |
| <i>Hevea brasiliensis</i>        | NC015308 | Plastome |
| <i>Hevea camargoana</i>          | MN781109 | Plastome |
| <i>Hevea nitida</i>              | MT413435 | Plastome |
| <i>Hevea pauciflora</i>          | NC059798 | Plastome |
| <i>Hevea spruceana</i>           | NC059799 | Plastome |
| <i>Hexalectris warnockii</i>     | MH444822 | Plastome |
| <i>Holcoglossum lingulatum</i>   | NC041465 | Plastome |
| <i>Homalium ceylanicum</i>       | NC045235 | Plastome |
| <i>Homalium cochinchinense</i>   | NC045919 | Plastome |
| <i>Homalium hainanense</i>       | NC054193 | Plastome |
| <i>Homalium paniculiflorum</i>   | NC045233 | Plastome |
| <i>Homalium racemosum</i>        | MN078136 | Plastome |
| <i>Homalium stenophyllum</i>     | NC045234 | Plastome |
| <i>Hydrangea serrata</i>         | KY412468 | Plastome |
| <i>Hypericum ascyron</i>         | MZ424306 | Plastome |
| <i>Idesia polycarpa</i>          | NC032060 | Plastome |
| <i>Ilex crenata</i>              | MW528027 | Plastome |
| <i>Iris gatesii</i>              | NC024936 | Plastome |
| <i>Iris sanguinea</i>            | NC029227 | Plastome |
| <i>Isodon rubescens</i>          | NC053708 | Plastome |
| <i>Itoa orientalis</i>           | NC037411 | Plastome |
| <i>Jatropha curcas</i>           | NC012224 | Plastome |
| <i>Kuhlhasseltia nakaiana</i>    | KY354041 | Plastome |
| <i>Lankesterella ceracifolia</i> | NC047203 | Plastome |
| <i>Lecanorchis japonica</i>      | MN200364 | Plastome |
| <i>Lecanorchis kiusiana</i>      | MN200363 | Plastome |
| <i>Leptopus cordifolius</i>      | NC058615 | Plastome |
| <i>Ligustrum quihoui</i>         | NC057246 | Plastome |
| <i>Limodorum abortivum</i>       | MH590355 | Plastome |
| <i>Linum grandiflorum</i>        | NC058845 | Plastome |

|                                                      |          |          |
|------------------------------------------------------|----------|----------|
| <i>Linum leonii</i>                                  | MW365714 | Plastome |
| <i>Linum lewisii</i>                                 | NC058799 | Plastome |
| <i>Linum narbonense</i>                              | NC058855 | Plastome |
| <i>Linum strictum</i>                                | MW364865 | Plastome |
| <i>Linum usitatissimum</i>                           | NC036356 | Plastome |
| <i>Liparis auriculata</i>                            | MN200365 | Plastome |
| <i>Lonicera ruprechtiana</i>                         | NC056986 | Plastome |
| <i>Lophira alata</i>                                 | MZ274135 | Plastome |
| <i>Lophira lanceolata</i>                            | MZ274136 | Plastome |
| <i>Ludisia discolor</i>                              | NC030540 | Plastome |
| <i>Lycopodium clavatum</i>                           | NC040994 | Plastome |
| <i>Lysimachia congestiflora</i>                      | NC045275 | Plastome |
| <i>Macaranga tanarius</i>                            | MW297079 | Plastome |
| <i>Machilus thunbergii</i>                           | NC038204 | Plastome |
| <i>Mallotus japonicus</i>                            | NC057003 | Plastome |
| <i>Mallotus paniculatus</i>                          | NC058595 | Plastome |
| <i>Mallotus peltatus</i>                             | NC047284 | Plastome |
| <i>Manihot esculenta</i>                             | NC010433 | Plastome |
| <i>Masdevallia coccinea</i>                          | NC026541 | Plastome |
| <i>Maytenus guangxiensis</i>                         | NC047301 | Plastome |
| <i>Monimopetalum chinense</i>                        | MK450440 | Plastome |
| <i>Morus alba</i>                                    | NC057087 | Plastome |
| <i>Neofinetia falcata</i>                            | KT726909 | Plastome |
| <i>Neottia acuminata</i>                             | NC030709 | Plastome |
| <i>Neottia camtschatea</i>                           | NC030707 | Plastome |
| <i>Neottia fugongensis</i>                           | NC030711 | Plastome |
| <i>Neottia listeroides</i>                           | NC030713 | Plastome |
| <i>Neottia nidus-avis</i>                            | NC016471 | Plastome |
| <i>Neottia ovata</i>                                 | NC030712 | Plastome |
| <i>Neottia pinetorum</i>                             | NC030710 | Plastome |
| <i>Neuwiedia zollingeri</i> var. <i>singaporeana</i> | LC199503 | Plastome |
| <i>Nymphaea tetragona</i>                            | NC057565 | Plastome |
| <i>Oberonia japonica</i>                             | NC035832 | Plastome |
| <i>Olmediella betschleriana</i>                      | NC043886 | Plastome |
| <i>Oncidium sphacelatum</i>                          | NC028148 | Plastome |
| <i>Ophrys sphegodes</i>                              | AP018717 | Plastome |
| <i>Oreorchis patens</i>                              | MN200369 | Plastome |
| <i>Orixa japonica</i>                                | NC057647 | Plastome |
| <i>Oxalis corniculata</i>                            | NC051971 | Plastome |

|                                       |          |          |
|---------------------------------------|----------|----------|
| <i>Oxalis corymbosa</i>               | NC048890 | Plastome |
| <i>Oxalis drummondii</i>              | NC043802 | Plastome |
| <i>Oxalis pes-caprae</i>              | MT537169 | Plastome |
| <i>Palmorchis pabstii</i>             | NC041190 | Plastome |
| <i>Paphiopedilum armeniacum</i>       | NC026779 | Plastome |
| <i>Paphiopedilum dianthum</i>         | NC036958 | Plastome |
| <i>Paphiopedilum niveum</i>           | NC026776 | Plastome |
| <i>Parnassia brevistyla</i>           | MG792145 | Plastome |
| <i>Parnassia chinensis</i>            | MK887918 | Plastome |
| <i>Parnassia crassifolia</i>          | MK580538 | Plastome |
| <i>Parnassia delavayi</i>             | MK887917 | Plastome |
| <i>Parnassia degenensis</i>           | MK887909 | Plastome |
| <i>Parnassia epunctulata</i>          | MK887919 | Plastome |
| <i>Parnassia faberi</i>               | OL450472 | Plastome |
| <i>Parnassia leptophylla</i>          | MK887913 | Plastome |
| <i>Parnassia longipetala</i>          | MK887914 | Plastome |
| <i>Parnassia lutea</i>                | MK887915 | Plastome |
| <i>Parnassia nubicola</i>             | MK887912 | Plastome |
| <i>Parnassia oreophila</i>            | MK887916 | Plastome |
| <i>Parnassia palustris</i>            | NC045280 | Plastome |
| <i>Parnassia qinghaiensis</i>         | MK887910 | Plastome |
| <i>Parnassia tenella</i>              | MK887920 | Plastome |
| <i>Parnassia tibetana</i>             | MK887923 | Plastome |
| <i>Parnassia trinervis</i>            | NC043951 | Plastome |
| <i>Parnassia venusta</i>              | MK887911 | Plastome |
| <i>Parnassia viridiflora</i>          | MK887921 | Plastome |
| <i>Parnassia wightiana</i>            | MN398191 | Plastome |
| <i>Pelatantheria scolopendrifolia</i> | NC035829 | Plastome |
| <i>Pendulorchis himalaica</i>         | NC041513 | Plastome |
| <i>Persicaria chinensis</i>           | MN627221 | Plastome |
| <i>Phalaenopsis equestris</i>         | NC017609 | Plastome |
| <i>Phragmipedium longifolium</i>      | NC028149 | Plastome |
| <i>Phyllanthus amarus</i>             | NC047474 | Plastome |
| <i>Phyllanthus emblica</i>            | NC047477 | Plastome |
| <i>Phyllanthus urinaria</i>           | OL693862 | Plastome |
| <i>Pinus thunbergii</i>               | PINCPTRP | Plastome |
| <i>Platanthera mandarinorum</i>       | MN200370 | Plastome |
| <i>Pleione bulbocodioides</i>         | NC036342 | Plastome |
| <i>Plukenetia volubilis</i>           | NC058006 | Plastome |

|                                                                        |          |          |
|------------------------------------------------------------------------|----------|----------|
| <i>Pogonia japonica</i>                                                | MN200371 | Plastome |
| <i>Pogonia minor</i>                                                   | MN200372 | Plastome |
| <i>Poliothyrsis sinensis</i>                                           | NC037412 | Plastome |
| <i>Populus adenopoda</i>                                               | NC032368 | Plastome |
| <i>Populus afghanica</i>                                               | NC045396 | Plastome |
| <i>Populus alba</i>                                                    | NC008235 | Plastome |
| <i>Populus alba</i> var. <i>pyramidalis</i>                            | MK341061 | Plastome |
| <i>Populus alba</i> x <i>Populus glandulosa</i>                        | NC058277 | Plastome |
| <i>Populus angustifolia</i>                                            | NC037413 | Plastome |
| <i>Populus balsamifera</i>                                             | NC024735 | Plastome |
| <i>Populus cathayana</i>                                               | NC040874 | Plastome |
| <i>Populus ciliata</i>                                                 | MW376769 | Plastome |
| <i>Populus davidiana</i>                                               | NC032717 | Plastome |
| <i>Populus davidiana</i> x <i>Populus alba</i> var. <i>pyramidalis</i> | NC044462 | Plastome |
| <i>Populus deltoides</i>                                               | NC040929 | Plastome |
| <i>Populus euphratica</i>                                              | NC024747 | Plastome |
| <i>Populus fremontii</i>                                               | NC024734 | Plastome |
| <i>Populus glandulosa</i>                                              | NC058278 | Plastome |
| <i>Populus glauca</i>                                                  | MW376848 | Plastome |
| <i>Populus gonggaensis</i>                                             | NC040873 | Plastome |
| <i>Populus grandidentata</i>                                           | MW376777 | Plastome |
| <i>Populus haoana</i>                                                  | NC040872 | Plastome |
| <i>Populus heterophylla</i>                                            | MW376781 | Plastome |
| <i>Populus hopeiensis</i>                                              | NC040871 | Plastome |
| <i>Populus ilicifolia</i>                                              | NC031371 | Plastome |
| <i>Populus iliensis</i>                                                | MW376784 | Plastome |
| <i>Populus intramongolica</i>                                          | MW376785 | Plastome |
| <i>Populus kangdingensis</i>                                           | NC040870 | Plastome |
| <i>Populus koreana</i>                                                 | NC037414 | Plastome |
| <i>Populus lasiocarpa</i>                                              | NC036040 | Plastome |
| <i>Populus laurifolia</i>                                              | NC037415 | Plastome |
| <i>Populus mainlingensis</i>                                           | MW376794 | Plastome |
| <i>Populus maximowiczii</i>                                            | OK110251 | Plastome |
| <i>Populus mexicana</i>                                                | NC047300 | Plastome |
| <i>Populus nigra</i>                                                   | NC037416 | Plastome |
| <i>Populus ningshanica</i>                                             | MW376802 | Plastome |
| <i>Populus pamirica</i>                                                | MW376803 | Plastome |
| <i>Populus platyphylla</i>                                             | MW376804 | Plastome |
| <i>Populus pruinosa</i>                                                | NC037417 | Plastome |

|                                                     |          |          |
|-----------------------------------------------------|----------|----------|
| <i>Populus pseudoglauca</i>                         | NC040869 | Plastome |
| <i>Populus pseudomaximowiczii</i>                   | MW376810 | Plastome |
| <i>Populus qamdoensis</i>                           | NC040868 | Plastome |
| <i>Populus qiongdaoensis</i>                        | NC031398 | Plastome |
| <i>Populus rotundifolia</i>                         | NC033876 | Plastome |
| <i>Populus rotundifolia</i> var. <i>duclouxiana</i> | MK267306 | Plastome |
| <i>Populus schneideri</i>                           | NC040867 | Plastome |
| <i>Populus shanxiensis</i>                          | MW376822 | Plastome |
| <i>Populus simonii</i>                              | NC037418 | Plastome |
| <i>Populus suaveolens</i>                           | MW376826 | Plastome |
| <i>Populus szechuanica</i>                          | NC037419 | Plastome |
| <i>Populus szechuanica</i> var. <i>rockii</i>       | MW376819 | Plastome |
| <i>Populus szechuanica</i> var. <i>tibetica</i>     | MW376833 | Plastome |
| <i>Populus talassica</i>                            | MW376834 | Plastome |
| <i>Populus tomentosa</i>                            | NC040866 | Plastome |
| <i>Populus tremula</i>                              | NC027425 | Plastome |
| <i>Populus tremula</i> × <i>Populus alba</i>        | NC028504 | Plastome |
| <i>Populus trichocarpa</i>                          | NC009143 | Plastome |
| <i>Populus trinervis</i>                            | NC037420 | Plastome |
| <i>Populus ussuriensis</i>                          | MW376845 | Plastome |
| <i>Populus wenxianica</i>                           | MW376846 | Plastome |
| <i>Populus wilsonii</i>                             | NC037223 | Plastome |
| <i>Populus wulianensis</i>                          | NC058847 | Plastome |
| <i>Populus</i> × <i>canadensis</i>                  | NC040928 | Plastome |
| <i>Populus</i> × <i>jrtyschensis</i>                | MW376855 | Plastome |
| <i>Populus xiangchengensis</i>                      | NC040953 | Plastome |
| <i>Populus yatungensis</i>                          | MW376856 | Plastome |
| <i>Populus yunnanensis</i>                          | NC037421 | Plastome |
| <i>Populus yunnanensis</i> var. <i>microphylla</i>  | MW376821 | Plastome |
| <i>Prockia crucis</i>                               | MN078147 | Plastome |
| <i>Prunus yedoensis</i>                             | KU985054 | Plastome |
| <i>Pseudostellaria heterophylla</i>                 | MK801111 | Plastome |
| <i>Quercus acuta</i>                                | NC054352 | Plastome |
| <i>Rhizanthella gardneri</i>                        | NC014874 | Plastome |
| <i>Rhododendron simsii</i>                          | NC053764 | Plastome |
| <i>Ricinus communis</i>                             | NC016736 | Plastome |
| <i>Rourea microphylla</i>                           | MT537171 | Plastome |
| <i>Salacia amplifolia</i>                           | NC047214 | Plastome |
| <i>Salix acutifolia</i>                             | MW435413 | Plastome |

|                                |          |          |
|--------------------------------|----------|----------|
| <i>Salix alba</i>              | MW435415 | Plastome |
| <i>Salix annulifera</i>        | MZ365447 | Plastome |
| <i>Salix appendiculata</i>     | MW435416 | Plastome |
| <i>Salix arbutifolia</i>       | NC036718 | Plastome |
| <i>Salix argyracea</i>         | NC056250 | Plastome |
| <i>Salix aurita</i>            | MW435418 | Plastome |
| <i>Salix babylonica</i>        | NC028350 | Plastome |
| <i>Salix bicolor</i>           | MW435419 | Plastome |
| <i>Salix brachista</i>         | NC058984 | Plastome |
| <i>Salix breviserrata</i>      | MW435421 | Plastome |
| <i>Salix caprea</i>            | MW435424 | Plastome |
| <i>Salix chaenomeloides</i>    | NC037422 | Plastome |
| <i>Salix cheilophila</i>       | NC060294 | Plastome |
| <i>Salix chienii</i>           | MW969692 | Plastome |
| <i>Salix cinerea</i>           | MW435426 | Plastome |
| <i>Salix cupularis</i>         | NC057535 | Plastome |
| <i>Salix dasyclados</i>        | NC056251 | Plastome |
| <i>Salix dunnii</i>            | NC058985 | Plastome |
| <i>Salix elaeagnos</i>         | MW435428 | Plastome |
| <i>Salix eriocephala</i>       | NC056252 | Plastome |
| <i>Salix foetida</i>           | MW435429 | Plastome |
| <i>Salix fragilis</i>          | MW435430 | Plastome |
| <i>Salix glabra</i>            | MW435431 | Plastome |
| <i>Salix glaucosericea</i>     | MW435432 | Plastome |
| <i>Salix gordejvii</i>         | MW562004 | Plastome |
| <i>Salix gordejvii</i>         | NC058001 | Plastome |
| <i>Salix gracilistyla</i>      | NC043878 | Plastome |
| <i>Salix hastata</i>           | MW435433 | Plastome |
| <i>Salix helvetica</i>         | MW435435 | Plastome |
| <i>Salix herbacea</i>          | MW435436 | Plastome |
| <i>Salix hypoleuca</i>         | NC037423 | Plastome |
| <i>Salix integra</i>           | MT551162 | Plastome |
| <i>Salix integra</i>           | NC056253 | Plastome |
| <i>Salix interior</i>          | NC024681 | Plastome |
| <i>Salix kochiana</i>          | OL339478 | Plastome |
| <i>Salix koreensis</i>         | OK500208 | Plastome |
| <i>Salix koriyanagi</i>        | NC044419 | Plastome |
| <i>Salix lapponum</i>          | MW435437 | Plastome |
| <i>Salix linearistipularis</i> | MZ018223 | Plastome |



|                                                  |          |          |
|--------------------------------------------------|----------|----------|
| <i>Salix magnifica</i>                           | NC037424 | Plastome |
| <i>Salix maizhokungarensis</i>                   | NC060436 | Plastome |
| <i>Salix matsudana</i>                           | NC059039 | Plastome |
| <i>Salix matsudana</i> f. <i>tortuosa</i>        | MT872638 | Plastome |
| <i>Salix mielichhoferi</i>                       | MW435438 | Plastome |
| <i>Salix minjiangensis</i>                       | NC037425 | Plastome |
| <i>Salix myrsinifolia</i>                        | MW435439 | Plastome |
| <i>Salix myrtilloides</i>                        | MW435441 | Plastome |
| <i>Salix oreinoma</i>                            | NC035743 | Plastome |
| <i>Salix paraplesia</i>                          | NC037426 | Plastome |
| <i>Salix pentandra</i>                           | MW435443 | Plastome |
| <i>Salix psammophila</i>                         | NC051969 | Plastome |
| <i>Salix purpurea</i>                            | NC026722 | Plastome |
| <i>Salix rehderiana</i>                          | NC037427 | Plastome |
| <i>Salix repens</i> subsp. <i>rosmarinifolia</i> | MW435447 | Plastome |
| <i>Salix reticulata</i>                          | MW435445 | Plastome |
| <i>Salix retusa</i>                              | MW435446 | Plastome |
| <i>Salix rorida</i>                              | NC037428 | Plastome |
| <i>Salix serpyllifolia</i>                       | MW435448 | Plastome |
| <i>Salix silesiaca</i>                           | MW435449 | Plastome |
| <i>Salix sinopurpurea</i>                        | NC054198 | Plastome |
| <i>Salix sitchensis</i>                          | MW435450 | Plastome |
| <i>Salix spathulifolia</i>                       | MZ365445 | Plastome |
| <i>Salix suchowensis</i>                         | NC026462 | Plastome |
| <i>Salix taoensis</i>                            | NC037429 | Plastome |
| <i>Salix tetrasperma</i>                         | NC035744 | Plastome |
| <i>Salix triandra</i>                            | MW435451 | Plastome |
| <i>Salix triandroides</i>                        | NC058986 | Plastome |
| <i>Salix variegata</i>                           | NC057289 | Plastome |
| <i>Salix viminalis</i>                           | MW435452 | Plastome |
| <i>Salix viminalis</i> var. <i>gmelinii</i>      | OK505606 | Plastome |
| <i>Salix waldsteiniana</i>                       | MW435453 | Plastome |
| <i>Salix wilhelmsiana</i>                        | OL405086 | Plastome |
| <i>Salix wilsonii</i>                            | NC053549 | Plastome |
| <i>Sauropus spatulifolius</i>                    | NC058216 | Plastome |
| <i>Sauvagesia rhodoleuca</i>                     | MW772237 | Plastome |
| <i>Scolopia chinensis</i>                        | MN078144 | Plastome |
| <i>Scolopia saeva</i>                            | MN078143 | Plastome |
| <i>Sedirea japonica</i>                          | MN200373 | Plastome |

|                                 |          |          |
|---------------------------------|----------|----------|
| <i>Sinosasa longiligulata</i>   | MF066256 | Plastome |
| <i>Sloanea cordifolia</i>       | MW242789 | Plastome |
| <i>Sloanea dasycarpa</i>        | MW242790 | Plastome |
| <i>Sloanea hemsleyana</i>       | NC058626 | Plastome |
| <i>Sloanea leptocarpa</i>       | NC058570 | Plastome |
| <i>Sloanea longiaculeata</i>    | MW242791 | Plastome |
| <i>Sloanea sinensis</i>         | NC056387 | Plastome |
| <i>Sobralia callosa</i>         | NC028147 | Plastome |
| <i>Solanum anguivi</i>          | NC039611 | Plastome |
| <i>Sonchus arvensis</i>         | NC054161 | Plastome |
| <i>Spondias dulcis</i>          | NC059000 | Plastome |
| <i>Styrax japonicus</i>         | NC047429 | Plastome |
| <i>Testulea gabonensis</i>      | MZ274137 | Plastome |
| <i>Tetrataenium yunnanense</i>  | NC045183 | Plastome |
| <i>Thrixspermum japonicum</i>   | NC035831 | Plastome |
| <i>Torreya nucifera</i>         | MK978775 | Plastome |
| <i>Triadica sebifera</i>        | MT424756 | Plastome |
| <i>Tripterygium hypoglaucum</i> | MZ064576 | Plastome |
| <i>Tripterygium wilfordii</i>   | OK065822 | Plastome |
| <i>Vanilla planifolia</i>       | MN200375 | Plastome |
| <i>Vernicia fordii</i>          | NC034803 | Plastome |
| <i>Vernicia montana</i>         | NC057051 | Plastome |
| <i>Vicia sativa</i>             | KJ850242 | Plastome |
| <i>Xylosma congesta</i>         | MZ379835 | Plastome |
| <i>Xylosma longifolia</i>       | NC057050 | Plastome |
| <i>Zelkova serrata</i>          | MT165953 | Plastome |

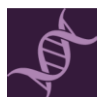

Supplementary Figures S1-S4.

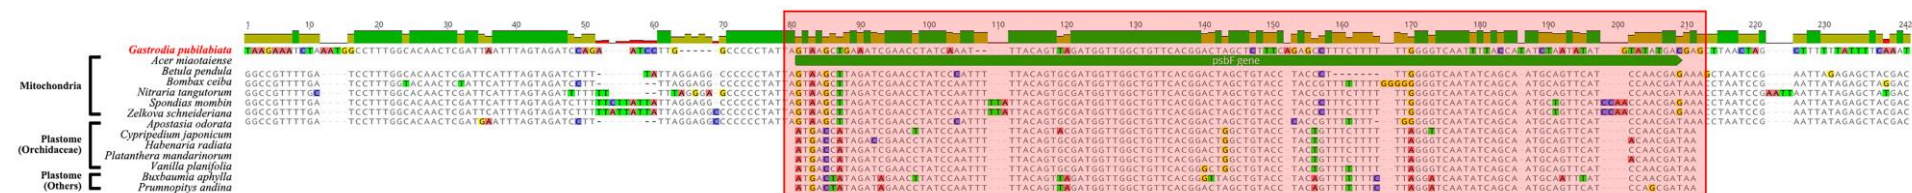

**Figure S1.** The alignment of mitochondrial *psbF* fragments. The red box indicates conserved *psbF* regions. And *Gastrodia pubilabiata* is highlighted with red font color.

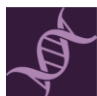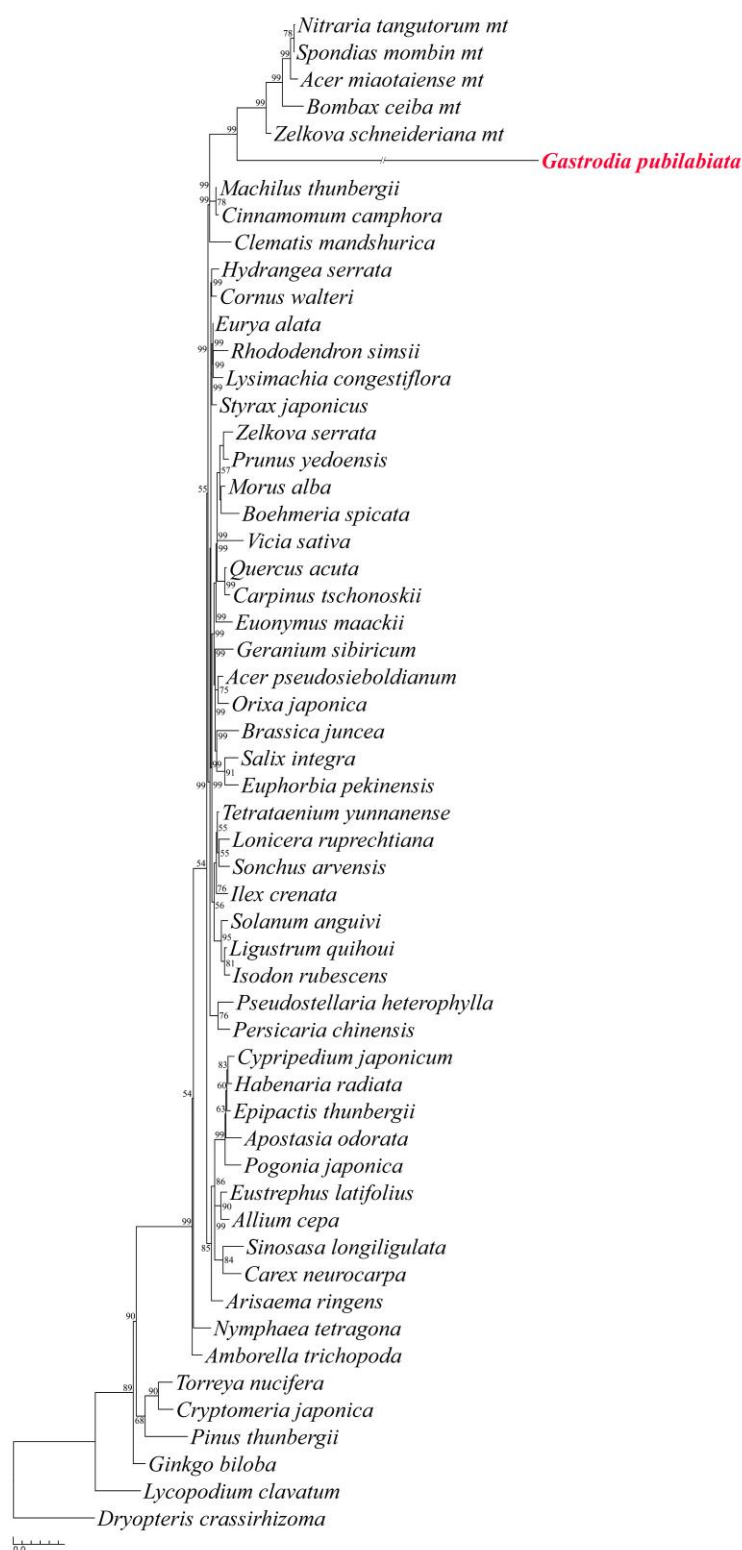

**Figure S2.** A maximum likelihood (ML) phylogenetic tree of *psbF* fragments with plastome origin *psbF* and mitochondrial *psbF* fragments.

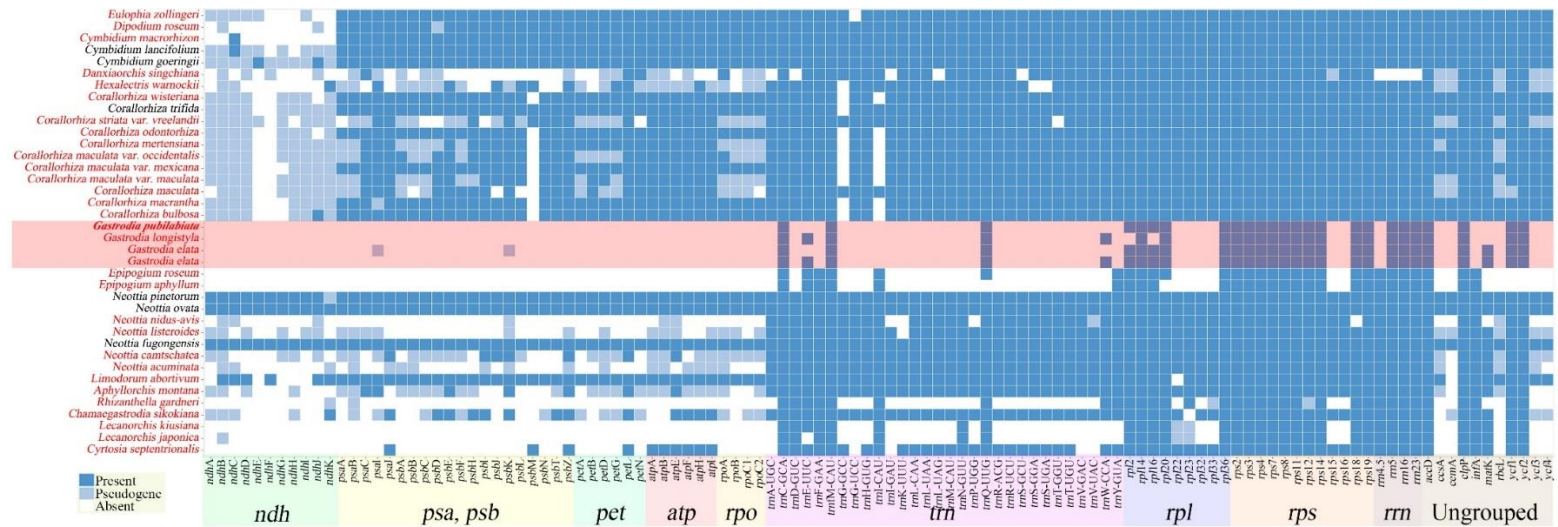

**Figure S3.** The plastome gene contents heatmap of Orchidaceae. Non-photosynthetic orchids were highlighted with red color. The genus *Gastrodia* is highlighted with red colored box.



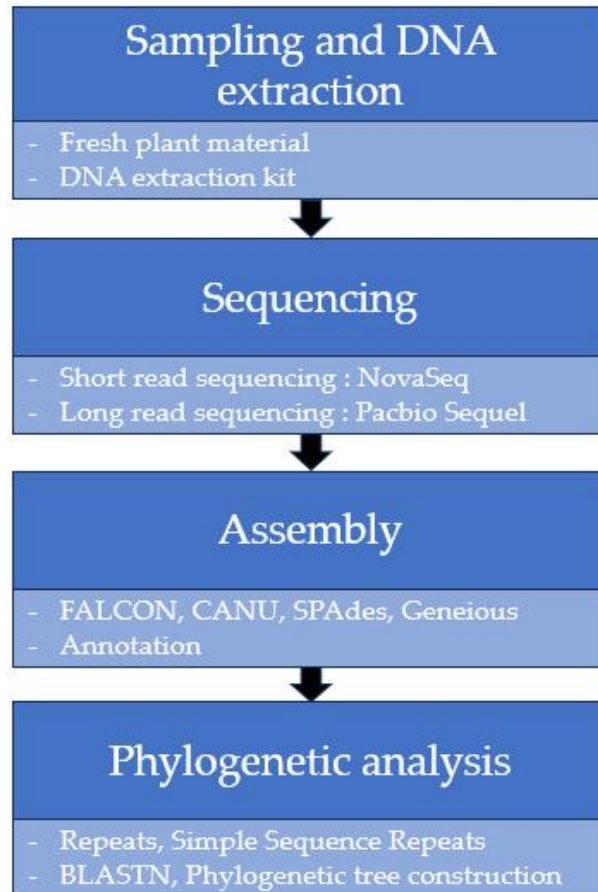

Figure S5: Overall analysis steps and procedures of this study.
